# Supplementary material for: Effects of Time, Temperature, and Solvent Ratio on the Extraction of Non-Extractable Polyphenols with Anticancer Activity of Barhi Date Palm Kernels Extracts Using Response Surface Methodology
Source: Preprints.org preprint supplement (doi:10.20944/preprints201907.0055.v1), 2019-07-03
Supplement: Supplementary file 1 [file supplementary]

# Manuscript\_Sci\_New

*by* Israa Mahmud

---

**Submission date:** 30-Jun-2019 11:36PM (UTC+0800)

**Submission ID:** 1148093164

**File name:** Mahmud\_Sci\_New\_Manuscript.pdf (1.86M)

**Word count:** 19243

**Character count:** 88752

1 Article

2 **Effects of Time, Temperature, and Solvent Ratio on**  
3 **the Extraction of Non-Extractable Polyphenols with**  
4 **Anticancer Activity of Barhi Date Palm Kernels**  
5 **Extracts Using Response Surface Methodology**

6 Israa A. Mahmud <sup>1\*</sup>, Mohamed E. S. Mirghani <sup>1,2\*</sup>, Faridah Yusof <sup>1</sup> and Ma'an Al-khatib <sup>1</sup>.

7 <sup>1</sup> Department of Biotechnology Engineering, Kulliyah (Faculty) of Engineering, International Islamic  
8 University Malaysia (IIUM), P. O. Box 10 Gombak, 50728 Kuala Lumpur, Malaysia;  
9 israa5446fa@gmail.com (I.M.); elwathig@iium.edu.my (M.E.S.M.); yfaridah@iium.edu.my (F.Y.);  
10 maan@iium.edu.my (M.A.).

11 <sup>2</sup> International Institute for Halal Research and Training (INHART), IIUM, Malaysia; elwathig@iium.edu.my  
12 (M.M.)

13 \* Correspondence: [elwathig@iium.edu.my](mailto:elwathig@iium.edu.my) (M.E.S.M.); [israa5446fa@gmail.com](mailto:israa5446fa@gmail.com) (I.M.)

14 **Abstract:** Dietary polyphenols exist in two forms; extractable polyphenols (EPP) or compounds  
15 solubilised by aqueous/organic solvents, and non-extractable polyphenols (NEPP) or compounds  
16 remain in the corresponding residues after the extraction. At present, most researchers focus on EEP  
17 fractions, while NEPP is neglected. Thus, this study aimed to release NEPP from the remaining  
18 powder residue of Barhi date palm kernels (BDPK) with acid hydrolysis. The related extraction  
19 conditions were determined and optimised using response surface methodology (RSM) for  
20 maximisation of NEPP with highest cytotoxic and antioxidant activities. The face-centred central  
21 composite design (FCCCD) was used to establish treatments based on three independent variables,  
22 namely; extraction temperature, time, and solvent/sample ratio. Under the optimal conditions, the  
23 experimental values for DPPH radical-scavenging capacity of NEPP ( $IC_{50}=57.52\mu\text{g/mL}$ ), and  
24 cytotoxicity of NEPP against A549 and HT29 cells were  $IC_{50}=17.4\mu\text{g/mL}$  and  $31.4\mu\text{g/mL}$ ,  
25 respectively. The experimental values were in agreement with those predicted by RSM models,  
26 confirming the suitability of the model employed and the success of RSM for optimisation of the  
27 extraction conditions for NEPP from BDPK. These results indicate that NEPP from industrial date  
28 fruit waste could be promising candidate as natural antioxidants with significant antiproliferation  
29 effect against A549 and HT29 cancer cells *in-vitro*.

30 **Keywords:** Barhi date palm kernels (BDPK); non-extractable polyphenols (NEPP); anticancer  
31 activity; antioxidant activity; response surface methodology; optimisation.  
32

33 **1. Introduction**

34 The kernel of the date palm tree (*Phoenix dactylifera* L.), which constitutes 10% of the fruit weight,  
35 is the major by-product of date processing industry. Date palm kernels (DPK) could be considered  
36 an excellent source of many valuable substances such as dietary fibres, carbohydrates, protein, oil,  
37 minerals, vitamins, amino acids and bioactive polyphenols with potential applications of DPK and  
38 their constituents in the human nutrition, cosmetics, and pharmaceutical applications that may be  
39 beneficial to human health [1,2]. DPK, in general, contain higher concentration of secondary  
40 metabolites compared to the edible fruit [3]. Given the scale of the international date industry, a large  
41 quantity of DPK can easily be collected from the date processing industries or from the date palm  
42 groves [2].

43 Such inexpensive, largely abundant and low-value date palm fruit waste could, however, 10  
44 potentially be industrially exploited [4,5]. A healthy caffeine-free coffee, which can be produced from  
45 roasted or unroasted DPK powders are produced commercially and are widely consumed in Middle  
46 Eastern countries [6]. Recently, DPK have been recognised as a source of bioactive compounds  
47 including dietary fibre, high amounts of polyphenols and natural antioxidants [7]. Additionally, DPK  
48 extracts have shown some positive molecular activities, including prevention or management of  
49 neurodegenerative diseases [6], inflammation [8] and cancer [9,10]. Previous studies suggested that  
50 the polyphenolic compounds are primarily responsible for the antioxidant and biological activities  
51 of DPK [3,7,11], and this was experimentally confirmed in the lab [12,13].

52 Plant secondary metabolites such as polyphenols, play an important role in the defence against  
53 free radicals. Medicinal plant parts (roots, leaves, kernels, stems, flowers and fruits) are commonly  
54 rich in phenolic compounds, such as flavonoids, tannins, stilbenes, coumarins, lignans [14].  
55 Polyphenolics exhibit a wide range of biological effects and such functions have been attributed to  
56 their free radical scavenging and antioxidant activities [15].

57 In view of these potential health benefits, there has been intensive research on natural  
58 antioxidants derived from plants. "Structurally, phenols comprise an aromatic ring bearing one or  
59 more hydroxyl substituents and range from simple molecules to highly polymerised compounds"  
60 [16]. It is well known that phenolic compounds exist in both extractable (free) and non-extractable  
61 (bound) forms in plant cells and that the extractable polyphenols (EPP) are solvent extractable. In  
62 contrast, the non-extractable polyphenols (NEPP), which are covalently bound to the plant matrix,  
63 cannot be extracted into water or aqueous/organic solvents mixtures [17].

64 Although the total phenolic contents and antioxidant activities of alcoholic DPK extracts have  
65 been investigated previously [3,9,11,18], these studies, only considered the extractable polyphenols  
66 (EPP) present in the DPK. Habib, *et al.* [19] and Ahmed, *et al.* [20] are the only ones who investigated  
67 the proanthocyanidins in their studies. "Proanthocyanidins are generally termed as NEPP when  
68 examining the TPC. NEPP represent the proportion of antioxidants remaining in the residue of the  
69 aqueous-organic extraction treatment of EPP, and this residue has been reported to contain large  
70 amounts of NEPP with specific biological activities" [2]. NEPP are large molecular weight, highly  
71 polymerised polyphenols, include hydrolysable tannins and proanthocyanidins covalently  
72 conjugated to cellulose, protein and polysaccharides through ester bonds, and can be difficult to  
73 hydrolyse [21,22]. NEPP are normally indigestible by intestinal enzymes [23]. It is anticipated that  
74 NEPP exert their antioxidant properties after being fermented by the colon microflora into bio-  
75 accessible phenolic compounds, which might be then beneficial to gastrointestinal health [24].  
76 Furthermore, it is reported that the NEPP could contribute 60% to 90% to the total polyphenol content  
77 (TPC), which emphasises the fact that the main biological activities such as antioxidant and  
78 antiproliferative activities attributed to polyphenols would reflect the contribution of this fraction of  
79 polyphenols, which is usually neglected, to the content of total polyphenols in foodstuffs [2].

80 Alkaline, acidic or enzymatic hydrolysis methods can be used to release bound phenolic  
81 compound. Such extraction methods were previously mentioned in a few studies [25,26]. Acid  
82 catalysed oxidative depolymerisation using HCl-butanol and a metal catalyst is commonly used to  
83 depolymerise polymeric proanthocyanidins [27]. For polyphenols, most extractions are carried out  
84 under acidic conditions because they are generally manifested in low pH, and the acidic condition  
85 helps polyphenols to scavenge free radicals more effectively. Moreover, polyphenols at low PH stay  
86 neutral, thus readily extracted into organic solvents. This is done using weak acid or low  
87 concentrations of a strong acid [28]. Therefore, one of the objectives of this study was to extract the  
88 NEPP using the HCl-butanol oxidative depolymerisation of DPK polyphenols from a commercially  
89 important date cultivar (Barhi). This date variety was selected mainly based on agronomical factors  
90 that favoured commercial cultivation of the dates [1]. In our lab, extractable polyphenols (EPP) from  
91 Barhi date palm kernels (BDPK) showed potent *in-vitro* inhibitive effect against two human cancer  
92 cell lines, namely; lung (A549) and colon (HT29) [12]. To our knowledge, no studies exist to date on  
93 the optimisation of extraction conditions for NEPP in BDPK and findings from the current study

94 would be helpful for appropriate analysis and quantification of this group of phenolic compounds in  
95 BDPK with anticancer activity.

96 An appropriate experimental design is necessary for any optimisation study, and the two most  
97 common designs are one-factor-at-a-time (OFAT) experiments and response surface methodology  
98 (RSM). OFAT experiments were used here to provide data regarding extraction factors with  
99 significant effects on phenolic antioxidants from BDPK. Next, these factors were analysed by RSM  
100 using face-centred central composite design (FCCCD) to more precisely determine optimal extraction  
101 conditions, that enables the simultaneous evaluation of the effects of selected ranges of independent  
102 variables and their interactions on response variables [29,30].

103 The extraction of polyphenols from plant materials is strongly influenced by many factors;  
104 extraction time, temperature and solvent-to-sample ratio among other factors [31,32]. Since the  
105 previous results [13] indicated that the EPP from BDPK were strong antioxidants and showed  
106 cytotoxic effects in selected human cancer cells, this research was carried out with the aim of  
107 optimising critical process parameters (extraction temperature, time and solvent/sample ratio)  
108 affecting the extraction of NEPP from BDPK using RSM in order to simultaneously maximise possible  
109 extraction of the TPC, TFC, TPAC with high DPPH• scavenging capacity and anticancer effects of  
110 NEPP extracts on A549 and HT29 human cancer cells.

## 111 2. Materials and Methods

### 112 2.1 Chemicals

113 Folin-Ciocalteu phenol reagent, gallic acid, ascorbic acid, catechin, aluminium chloride (AlCl<sub>3</sub>)  
114 and 2,2 diphenyl 1-picrylhydrazyl (DPPH), extraction solvents (methanol, butanol and ethanol),  
115 ferric chloride hexahydrate, and hydrochloric acid, sodium carbonate, were purchased from Sigma  
116 (St. Louis, MO, USA). Fetal bovine serum (FBS), RPMI 1640 medium, Penicillin-streptomycin solution  
117 and phosphate buffer saline (PBS) were from Nacalai Tesque INC. (Kyoto, Japan). Methanol and  
118 ethanol were from Merck Co. (Darmstadt, Germany). 3-(4,5 dimethylthiazol-2-yl)-2,5-  
119 diphenyltetrazolium bromide (MTT), Dimethyl sulfoxide (DMSO) and trypan blue were from Sigma  
120 (St. Louis, MO, USA). The human lung (A549) and human colon cancer cells (HT29) were obtained  
121 from American Type Tissue Collection (ATCC, Manassas, Va., USA.).

### 122 2.2. Extraction Procedure

#### 124 2.2.1. Preparation of Extractable Polyphenols (EPP) Fraction.

125 Extraction of extractable polyphenols (EPP) was carried out under optimised extraction  
126 conditions (by extracting for 2.37 hours at 43.23°C in 75.39% methanol/ethanol-to-water concentration  
127 and 54.57 mL/g of solvent/sample ratios). In this paper, which is based on unpublished data [12] was  
128 carried out following the method described by [12]. The collected EPP residues were used to extract  
129 the corresponding non-extractable (NEPP) from BDPK.

#### 131 2.2.2. Preparation of Non-Extractable Polyphenols (NEPP).

132 For the NEPP acid hydrolysis, the residue post-EPP extraction process under optimised  
133 conditions was collected and was used for the extraction of NEPP following the method described  
134 by Sirisena, *et al.* [33]. The extraction process was conducted in the absence of a metal catalyst. Sirisena  
135 and her colleagues compared the yield of NEPP extracted from DPK in the presence and the absence  
136 of Fe<sup>3+</sup> ions, and the results were obtained using spectrophotometric scan at absorption wavelength  
137 range 500 to 550 nm [21,33]. The scan for extraction without added Fe<sup>3+</sup> showed a significant increase  
138 in absorbance at 550 nm indicating extraction of proanthocyanin. Based on these results, the NEPP  
139 extraction method was modified and performed without Fe<sup>3+</sup> that could interfere with total flavonoid  
140 and antioxidant assays.

141 The applied analytical method (acid butanol assay) is based on the ability of monomer and  
142 condensed 3–4, flavandiols to oxidise in acid and alcoholic medium at high temperature to give  
143 coloured procyanidins. From the EPP residue, 2 g (dry weight) was mixed with 25-ml butanol/HCl  
144 (97.5:2.5, v/v) and heated at 100°C in a 10 ml flask placed in the centre of the magnetic stirrer, with  
145 stirring at a constant rate (at speed 7) for 3 hours (h). After the HCl-butanol depolymerisation, the  
146 mixture was centrifuged at 7000 rpm for 15 min, the supernatant was collected, and the residue was  
147 subjected to two times washings with 10 mL butanol. Supernatants were combined and evaporated  
148 at 60°C to a small volume, and the pH of the concentrated extract was adjusted to 4 with 1 M sodium  
149 hydroxide (NaOH). In a previous study [33], it was found that PH less than 4 and above 5 caused  
150 precipitation of the extract; hence PH ~4 was selected to maintain both intact extract and the  
151 compatibility with buffers. Using an amber reagent bottle, the dried extracts were collected, weighed  
152 to calculate the percent yield of the crude extract, capped tightly, freeze-dried and stored at -20°C  
153 until analysis. All the experiments were carried out in triplicate.

### 154 2.3. One-Factor-at-a-Time Experiments

155 Many factors can affect the extraction of NEPP with acid hydrolysis treatment. Three factors  
156 were selected, namely; extraction temperature, time and solvent/sample ratio. Firstly, the influence  
157 of the extraction time (1, 2, 3, 4, 5h) on the NEPP content was determined under the following fixed  
158 conditions butanol/HCl (97.5:2.5, v/v), solvent/sample ratio (12.5:1, ml/g) and extraction temperature  
159 100°C. Secondly, the impact of the liquid/solid ratio (5:1, 10:1, 15:1, 20:1, 25:1 ml/g) on the NEPP  
160 content under the following fixed conditions: butanol/HCl (97.5:2.5, v/v), extraction time 3 h,  
161 temperature 100°C. Finally, the influence of temperature (40, 60, 80, 100°C) on the NEPP yield under  
162 the following fixed conditions: butanol/HCl (97.5:2.5, v/v), solvent/sample ratio (20:1, ml/g),  
163 extraction time 3 h.

### 164 2.4. Chemical Analysis

#### 165 2.4.1. Determination of Non-Extractable TPC, TFC, TPAC Contents

166 The non-extractable TPC was determined by Folin-Ciocalteu colorimetric method [34]. The TFC  
167 was measured spectrophotometrically by using the aluminium chloride colorimetric assay [18].  
168 While, total proanthocyanidin content (TPAC) in BDPK extract was determined using vanillin-HCl  
169 assay described in the previous study [35].

#### 170 2.4.2 DPPH Free Radical Scavenging Assay

171 The electron donating ability of the obtained NEPP extracts was measured by bleaching a purple  
172 solution of 1,1- diphenyl-2-picrylhydrazyl (DPPH) radical and was estimated according to the  
173 method described previously [36]. Briefly, a solution of DPPH was freshly prepared by dissolving  
174 6 mg DPPH in 50 mL methanol to obtain a final concentration (0.3 mM). 2.5 mL of DPPH solution  
175 was mixed together with the methanol extract with varying concentrations (20–100 µg/mL) in a test  
176 tube and vibrated using vortex mixer for 20 seconds (s). Then, the samples and controls were  
177 incubated in the dark at room temperature. After 30 min of incubation, the absorbance of the samples  
178 and control was read at 517 nm against the blank. The absorbance was recorded, and the antioxidant  
179 activity was expressed by the percent inhibition of DPPH radicals and calculated using the following  
180 equation;

181

$$\% \text{inhibition of DPPH activity} = \frac{A_{\text{control}} - A_{\text{sample}}}{A_{\text{control}}} \times 100 \quad (1)$$

182  $A_{\text{control}}$ : the absorbance of control (DPPH + methanol solution only, without test sample).

183  $A_{\text{sample}}$ : the absorbance of the test sample (DPPH solution mixed with test sample extract/standard).

184 All measurements were performed in triplicate, and graphs were plotted using the average of three  
185 determinations.

### 186 2.4.3 Anti-Proliferative Effect of NEPP Extracts Against Cancer Cells

187 The potential antiproliferative/cytotoxic effect of non-extractable (NEPP) extracts against two  
188 human cancer cells lines (A549 and HT29) was tested using MTT assay. For screening, the cells were  
189 treated with the NEPP extracts at 0-1000 µg/ml concentration [13]. The IC<sub>50</sub> (inhibiting 50 % of cell  
190 growth) values of NEPP extracts were measured, and their direct antiproliferative/cytotoxic effects  
191 were determined.

### 192 2.5 Experimental Design and Statistical Analysis

193 After determining the preliminary range of extraction variables through the single-factor test, a  
194 three-level-three-factor, FCCCD was employed in this optimisation study. Dependent variables  
195 (responses) measured were (TPC, mg GAE/g DW), (TFC, mg CE/g DW), (TPAC, mg CE/g DW),  
196 (DPPH SAC, IC<sub>50</sub>, µg/mL), (yield, %), (A549 IC<sub>50</sub>, µg/mL) and (HT29 IC<sub>50</sub>, µg/mL) of NEPP extract  
197 from BDPK, and represented as responses  $R_1$ ,  $R_2$ ,  $R_3$ ,  $R_4$ ,  $R_5$ ,  $R_6$  and  $R_7$  respectively, were optimised  
198 using RSM. The independent variables of extraction temperature (°C), extraction time (h) and  
199 solvent/sample ratio ( $v/w$ , mL/g) were selected as three important factors to optimise the extraction  
200 of NEPP, and represented as variables A, B and C, and used to obtain the coefficients of the quadratic  
201 model using the aid of the Design-Expert software (version 7.0.2.; Stat-Ease, Inc., Minneapolis, MN,  
202 USA). The range and levels of the independent variables used in the experimental design in this study  
203 are shown in Table 1.  
204

205 **Table 1.** Independent variable values of the Barhi date palm kernels NEPP extraction process and  
206 their corresponding levels

| Independent variable                  | symbols | Coded independent variable levels |      |      |
|---------------------------------------|---------|-----------------------------------|------|------|
|                                       |         | -1                                | 0    | +1   |
| Temperature (°C)                      | [A]     | 70                                | 85   | 100  |
| Time (h)                              | [B]     | 2                                 | 3    | 4    |
| Solvent /sample ratio ( $v/w$ , mL/g) | [C]     | 1:15                              | 1:20 | 1:25 |

207 h, hour.

208

209 A total of 17 experiments were carried out as unveiled by the results in the single-factor  
210 experiments with three centre points to improve the precision of the method. Predicted (pred.) and  
211 adjusted (adj.) correlation coefficient ( $R^2$ ) was calculated to evaluate the quality of the fitted model,  
212 and its statistical significance was checked by F-test and  $p$ -value test. Analysis of variance (ANOVA)  
213 was performed to evaluate the effect of independent variables on the responses, and  $p < 0.05$  was  
214 statistically significant. All the experiments were carried out at random to minimise the influence of  
215 the unexplained variability in the observed responses due to systematic errors. Three-dimensional  
216 surface graphs were drawn to display the experimental region and the effects of independent  
217 variables on the responses.

### 218 2.6 Verification of the Experimental Model

219 Optimal conditions for the extraction of non-extractable TPC, TFC, TPAC and extract yield from  
220 BDPK with minimum IC<sub>50</sub> of antioxidant capacity and cytotoxicity to A549 and HT29 cancer cells  
221 were obtained using the FCCCD. The adequacy of the model equation for predicting the response  
222 values was verified by conducting the extractions under the recommended optimal points. In this  
223 study, a numerical optimisation method was adopted to find a point that maximises/minimises the

224 response. A series of solutions were generated and the solution to be employed for the verification  
225 would be selected based on its desirability and suitability [37]. The experimental and predicted values  
226 of responses (dependent variables) were compared in order to determine the validity of the model.  
227 To confirm the results, sets of experiments were carried out in triplicate under the selected optimised  
228 conditions. The percentage of the residual standard error (%) was calculated for each response.

## 229 2.7 Statistical Analysis

230 The data analyses were performed with Minitab 17 (Minitab Inc., State College, PA, USA)  
231 software to analyse the data by ANOVA. The mean values were considered significantly different  
232 when  $p$  value is less than 0.05. All experiments were carried out in triplicate, and the data were  
233 expressed as the mean  $\pm$  standard deviation (SD). The  $IC_{50}$  values were calculated from linear  
234 regression analysis. A Pearson correlation test was used to evaluate the relationship between the  
235 antioxidant activities, crude extract yield, total phenol content, total flavonoid content, total  
236 proanthocyanidin content and the anticancer activity of the NEPP crude extract from BDPK. The  
237 statistical significance level for correlation analysis was set up at  $p < 0.05$ . Optimal extraction  
238 conditions were estimated through three-dimensional response surface analyses of the three  
239 independent variables and the seven evaluated responses (dependent variables) using Design-Expert  
240 7.0.1 analysis software.

## 241 3. Results and Discussion

242 Here we report for the first time a database regarding the levels of cytotoxic and antioxidant  
243 activities of the polyphenols (NEPP) from BDPK. A calibration curve of gallic acid was constructed  
244 to measure the content of phenolic compounds in the NEPP from BDPK. The calibration equation for  
245 gallic acid (TPC) was  $y = 0.0075x + 0.017$  ( $R^2 = 0.9899$ ). The calibration equation for catechin (TFC) was  
246  $y = 0.0076x + 0.0442$  ( $R^2 = 0.9755$ ). While the calibration equation for catechin (TPAC) was  $y = 0.0082x$   
247  $+ 0.0197$  ( $R^2 = 0.9775$ ). The calibration curve of ascorbic acid was also measured to determine the  
248 scavenging potential of TPC, TFC and TPAC by DPPH. The calibration equation for ascorbic acid  
249 was  $y = 0.0105x - 0.0102$  ( $R^2 = 0.9802$ ). All results in the present study were calculated based on the  
250 above calibration curve and expressed as gallic acid equivalent (GAE) in mg per g dry weight (DW);  
251 catechin equivalent (CE) in mg per g dry weight (DW); and  $IC_{50}$ ,  $\mu\text{g/ml}$  scavenging effect of extract  
252 by DPPH.

### 253 3.1. One-Factor-at-a-time Experiments for Extraction NEPP From Barhi Date Palm Kernels

254 The initial step of the preliminary experiment was to investigate whether extraction  
255 temperature, extraction time and solvent/sample could be optimised for extraction of phenolic,  
256 flavonoid, proanthocyanidin with high antioxidant and cytotoxicity properties using one-factor-at-a-  
257 time (OFAT) experiments, to determine appropriate experimental ranges for subsequent  
258 optimisation analyses. This was performed by changing one factor while keeping the other two  
259 factors constant.

#### 260 3.1.1. Evaluation of Extraction Time:

261 Extraction time is an important parameter in optimising the recovery of phenolic compounds  
262 and antioxidant capacity. From literature, extraction time can be as small as few minutes or very long  
263 extending up to 24 hours depending on the phenolic compounds present in the plant material [30,38].

264 In the present study, extraction time played an important role in extraction of phenolic  
265 compounds (TPC, TFC and TPAC), crude extract yield, and their antioxidant/cytotoxic properties of  
266 BDPK NEPPs' extract. With 12.5:1 mL/g solvent/sample ratio, extraction times from 1 to 5 hours and  
267 an extraction temperature of 100°C were studied. As illustrated in Figure (1A, B, C), the extraction  
268 time affected TPC, TFC and TPAC significantly ( $p < 0.05$ ).

269 Non-extractable TPC, TFC and TPAC yield from BDPK extract was enhanced ( $5.80 \pm 0.44$ ,  
270  $2.63 \pm 0.39$ ,  $3.11 \pm 0.19$  mg) with a longer extraction time, peaking ( $8.26 \pm 0.67$ ,  $3.34 \pm 0.16$ ,  $6.95 \pm 0.38$  mg) at

271 3h, after which values decreased slightly ( $p > 0.05$ ). A similar trend was observed in the percentage  
272 yield of NEPP crude extract as that of TPC, TFC and TPAC (Figure 1E). This effect may be explained  
273 that a prolonged exposure of the sample in the solvent, enhanced the solubility process by allowing  
274 sufficient time for solvent penetration into the plant tissue dissolving the solute and subsequently  
275 migrate to the extraction medium [32]. Prolonging extraction times may allow recovered phenolic  
276 compounds to oxidise due to prolonged exposure of polyphenols to temperature, light and oxygen  
277 [39,40].

278 DPPH radical is a widely accepted tool to evaluate the free radical scavenging ability of natural  
279 compounds (Nagai, Inoue, Inoue, & Suzuki, 2003). The antioxidant potential is inversely proportional  
280 to the  $IC_{50}$  value, which was calculated from the linear regression of the antioxidant activity versus  
281 the extract concentration. The maximum scavenging capacity of DPPH radicals of NEPP extract from  
282 BDPK occurred at 3h ( $IC_{50} = 61.82 \pm 4.53 \mu\text{g/mL}$ ). However, these yields (TPC, TFC, TPAC) and  
283 antioxidant capacity decreased significantly ( $p < 0.05$ ) at 5h ( $7.02 \pm 0.40$ ,  $2.64 \pm 0.27$ ,  $5.96 \pm 0.68$ ) and  
284 ( $IC_{50} = 64.33 \pm 3.58 \mu\text{g/mL}$ ), respectively (Figure 1A, B, C, D).

285 Our previous work [13] confirmed that the NEPP extracts of BDPK demonstrated selective  
286 cytotoxicity towards human lung (A549) and colon cancer (HT29) cell lines while being less cytotoxic  
287 against the normal cells. Such selective cytotoxic activity suggested that the "active substances  
288 interacted with special cancer-associated receptors or cancer cell special molecule, thus triggering  
289 some mechanisms that cause cancer cell death" [41].

290 Data in Figure 1F, G revealed similar antiproliferation property pattern on both cancer cells as  
291 of DPPH radical scavenging capacity, in which the inhibitory effect of NEPP on the cell growth  
292 improved significantly ( $p < 0.05$ ) at 3 h;  $IC_{50} = 43.15 \pm 7.79 \mu\text{g/ml}$  and  $IC_{50} = 47.32 \pm 13.63 \mu\text{g/ml}$ , in both  
293 cancer cells A549 and HT29, respectively.

294 However, this effect started to decrease beyond 3h, but insignificantly (Figure 1F, G). Therefore,  
295 a longer extraction time had no effect on the extraction of phenolic compounds [42]. Furthermore,  
296 inordinately long extraction process might lead to oxidation of phenolic compounds owing to  
297 prolonged light or oxygen exposure, which might lead towards the decreased of free radical  
298 scavenging ability of NEPP extract from BDPK and accordingly decreased its antiproliferative effect  
299 against cancer cells. The decomposition in polyphenolic compounds is also manifested by a decline  
300 in antioxidant activity [40].

301 Thus, taking into account the economic point of view and also depending upon the  
302 quantification (yield) of phenolic compounds and antioxidant/cytotoxic activities of BDPK NEPP  
303 extract, 3 h was selected as the optimal extraction time because at this time period all responses  
304 showed the highest values. So, an extraction time of 2–4 h was chosen for RSM optimisation.

305  
306  
307  
308  
309  
310  
311  
312  
313  
314  
315  
316  
317  
318  
319  
320  
321  
322

323

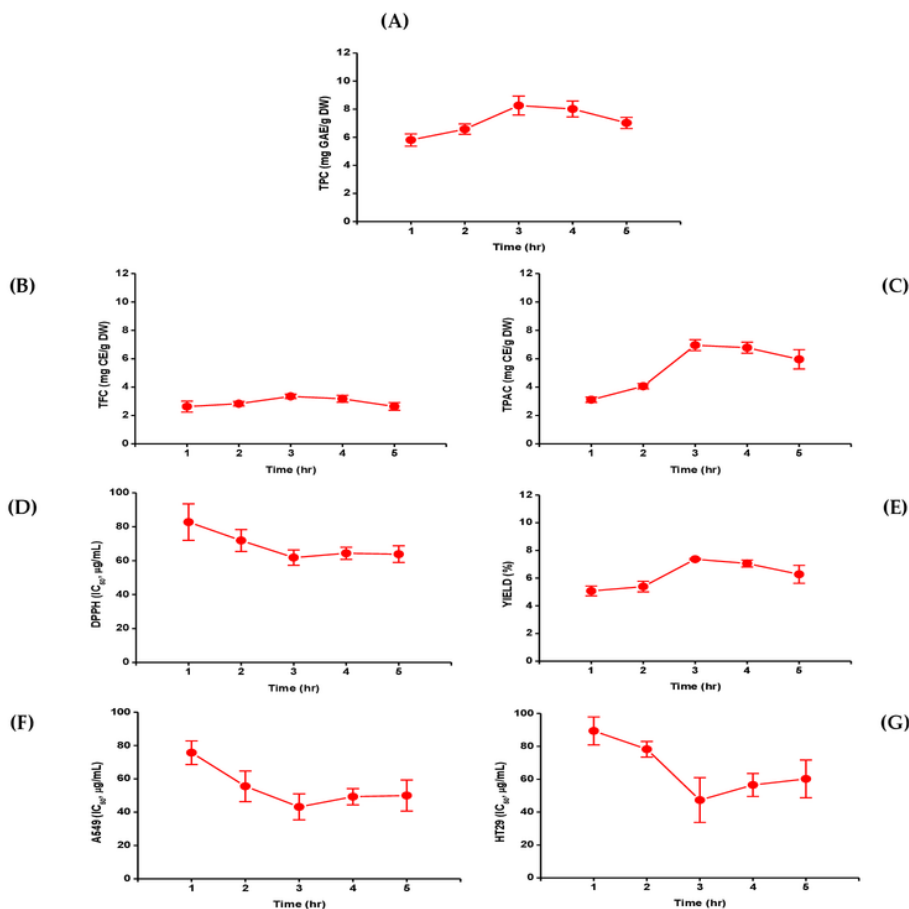

324 **Figure 1.** Effects of extraction time (h) on (A) TPC, (B) TFC, (C) TPAC, (D) DPPH scavenging capacity,  
 325 (E) extracts yield and on the cytotoxicity of extracts in (F) A549 and (G) HT29 cells in non-extractable  
 326 polyphenols extracts from Barhi date palm kernels. Extraction was conducted under these conditions;  
 327 extraction temperature = 100°C and solvent/sample ratio = 12.5:1 mL/g.

### 328 3.1.2. Evaluation of Solvent/Sample Ratio:

329 Different solvent/sample ratio was needed for the maximum recovery of phenolic, flavonoids  
 330 and proanthocyanidins compounds and antioxidant and antiproliferation activities against cancer  
 331 cells. Figure 2 reveals that the total extraction yield (TPC, TFC, TPAC), crude extract yield, DPPH  
 332 radical scavenging activity and antiproliferative capacity of NEPP significantly ( $p < 0.05$ ) increased  
 333 by the solvent/sample ratio until the ratio was 20:1 mL g<sup>-1</sup>; after that, the NEPP yields and DPPH  
 334 radical scavenging activity were almost unchanged ( $p > 0.05$ ). A higher extraction solvent ratio can  
 335 cause larger amounts of components from plant material to diffuse into solvent more effectively,  
 336 bringing in a promoted extraction efficiency [43,44].

337

338

339

340

341

342

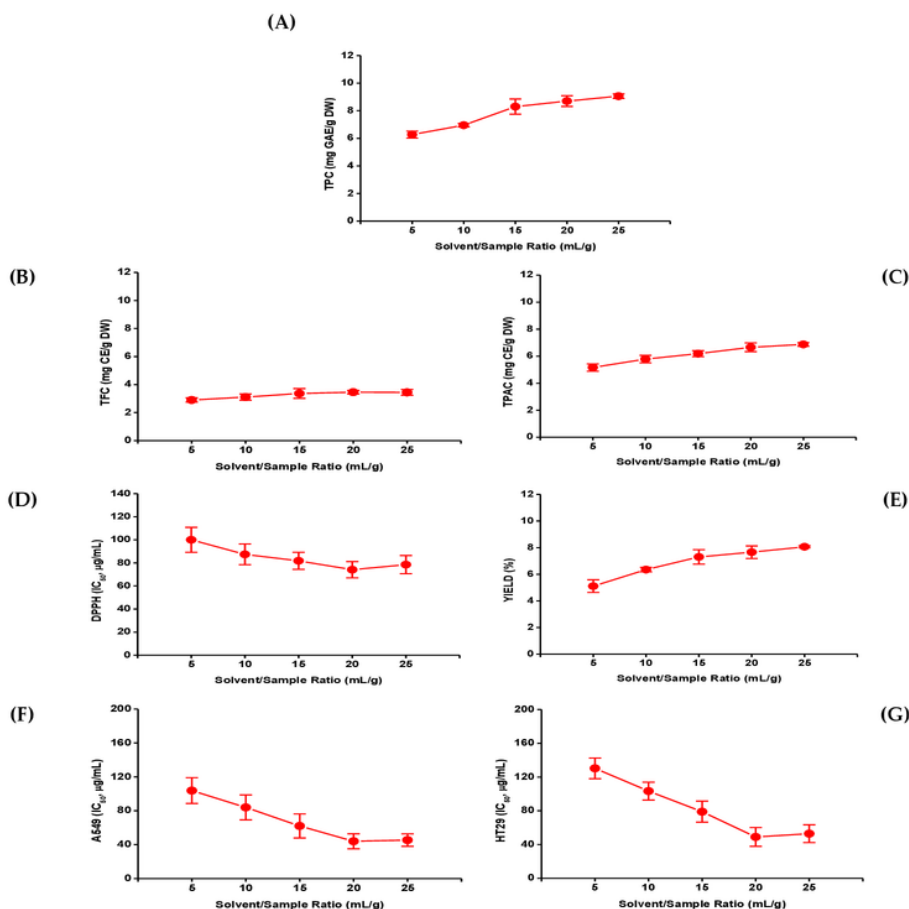

343 **Figure 2.** Effects of solvent/sample ratio (mL/g) on (A) TPC, (B) TFC, (C) TPAC, (D) DPPH scavenging  
 344 capacity, (E) extracts yield and on the cytotoxicity of extracts in (F) A549 and (G) HT29 cells in non-  
 345 extractable polyphenols extracts from Barhi date palm kernels. Extraction was conducted under these  
 346 conditions; extraction temperature = 100°C and extraction time = 3h.

347 The anticancer capacity of NEPP from BDPK was evaluated against human lung (A549) and  
 348 colon (HT29) cancer cell lines. Results presented in Figure 2F, G are expressed as concentration  
 349 inhibiting fifty percent of cell growth (IC<sub>50</sub>). Among the five NEPP extracts, extraction with 20:1 mL/g  
 350 solvent-sample ratio exerted the most potent cytotoxic activity against human lung carcinoma A549  
 351 and colon cancer cells with IC<sub>50</sub> values equal to  $44.02 \pm 8.854 \mu\text{g/ml}$  and  $49.03 \pm 11.215 \mu\text{g/ml}$ ,  
 352 respectively. However, these activities were less cytotoxic in lower or higher solvent ratio (Figure 2F,  
 353 G). These data suggest that NEPP from BDPK reduces effectively human lung carcinoma and colon  
 354 cancer cell viability. These results highlight for the first time the strong activity of BDPKs' NEPP  
 355 against lung carcinoma (A549) and human colon cancer (HT29) cell lines.

356 Although, [45] showed that extractable polyphenols (EPP) from Ajwa date fruits were cytotoxic  
 357 against other cancer cell lines such as hepatocellular carcinoma (HCT-116). Al-Sayyed, *et al.* [46]  
 358 found that increasing consumption of dried date fruit reduced significantly the incidence rate of  
 359 mammary cancer, palpable tumour multiplicity, tumour size and weight compared to the positive  
 360 control group. In another study, Eid, *et al.* [47] studied the effect of the whole date fruit extract and  
 361 its polyphenol-rich extract, which were prepared from methanol/water (4:1, *v/v*) containing 10% of 1  
 362 molar sodium fluoride (NaF) solution, on the Caco-2 cell lines. In the same study, they found that  
 363 both extracts were able to inhibit Caco-2 cell growth, indicating that both were capable of probably

364 acting as anti-proliferative agents *in-vitro* [47]. Based on the given results, 20:1 mL g<sup>-1</sup> was ascertained  
365 as the solvent/sample ratio for RSM.

### 366 3.1.3. Evaluation of Extraction Temperature:

367 Heat can enhance the recovery of the phenolic compounds in some cases, as described by [7,42].  
368 Generally, a high extraction temperature had a positive effect on the yield of phenolic compounds,  
369 but these increments are not consistent. Here, incubation temperatures for NEPP; TPC, TFC, TPAC  
370 recovery; crude extract yield, DPPH radical scavenging capacity and cytotoxicity were between 55–  
371 100°C (20:1 mL/g solve/sample ratio, 3 hours extraction time). A direct relationship was observed  
372 between the extraction temperature and TPC recovery, as shown in Figure 2A. With respect to TFC  
373 and TPAC recovery, DPPH radical-scavenging capacity, and NEPP crude extract yield, the extraction  
374 temperature was optimal at 85, 70, 85, and 85°C, respectively (Figure 2B, C, D, E).

375 Increased temperature led to enhance the extraction efficiency through increases of surface  
376 contact area and decreases viscosity and density of solvent media. These factors favoured the release  
377 of NEPP (bound phenolics) from plant material and weaken the cell wall integrity, thus, enhancing  
378 solubility and diffusion coefficients [48]. Increasing temperature may accelerate the transfer of NEPP  
379 and disrupt plant cellular constituents which may lead to increased cell membrane permeability, thus  
380 helped to release NEPP [49]. According to the equilibrium principle, the elevated temperature could  
381 improve the extraction rate and thereby reduce the extraction time required to reach the maximum  
382 recovery of phenolic compounds [50].

383 However, elevated temperatures may not be suitable for all phenolic compounds, especially  
384 those thermally sensitive, and thus easily oxidised as a function of temperature [39]. The TFC  
385 recovery was maximised at 85°C, while TPAC recovery was maximised at 70°C (Figure 3B, C). After  
386 these points, the recovery of TFC and TPAC were decreased, and this could be attributed to the  
387 decomposition of some thermally unstable flavonoids and proanthocyanidins [39]. Similar results  
388 were observed with respect to DPPH radical-scavenging capacity, which peaked at 85°C (Figure 3D).  
389 NEPP extract was able to reduce the blue DPPH radical solution into a yellow stable compound at  
390 IC<sub>50</sub> = 71.62 ± 9.31 µg/mL but then declined moderately ( $p > 0.05$ ) with further increases in temperature  
391 (Figure 3D).

392 Phenolic compounds which are powerful antioxidants are known to have, in many cases, anti-  
393 proliferative activities against most cancer cell lines [51]. Several methods have been used to measure  
394 the antioxidant activities of EPP from date fruit (Amari and Hallawi) varieties and were reported to  
395 possess antioxidant activity comparable to vitamin C [52]. The earlier investigation reported that date  
396 fruits have the highest concentration of total polyphenols among the dried fruits due to the greater  
397 exposure to sunlight and extreme temperature for date fruits compared to other fruits [53].

398 Data in Figure 3F, G showed broadly similar pattern of antiproliferation activity of the tested  
399 NEPP extracts under various temperature ranges (55-100°C) against two human cancer (A549 and  
400 HT29) cell lines *in-vitro* and showed the highest cytotoxicity at 85°C (Figure 3F, G), therefore an  
401 optimal temperature of 85°C, was used for RSM optimisation.

402  
403  
404  
405  
406  
407  
408  
409  
410  
411  
412  
413  
414

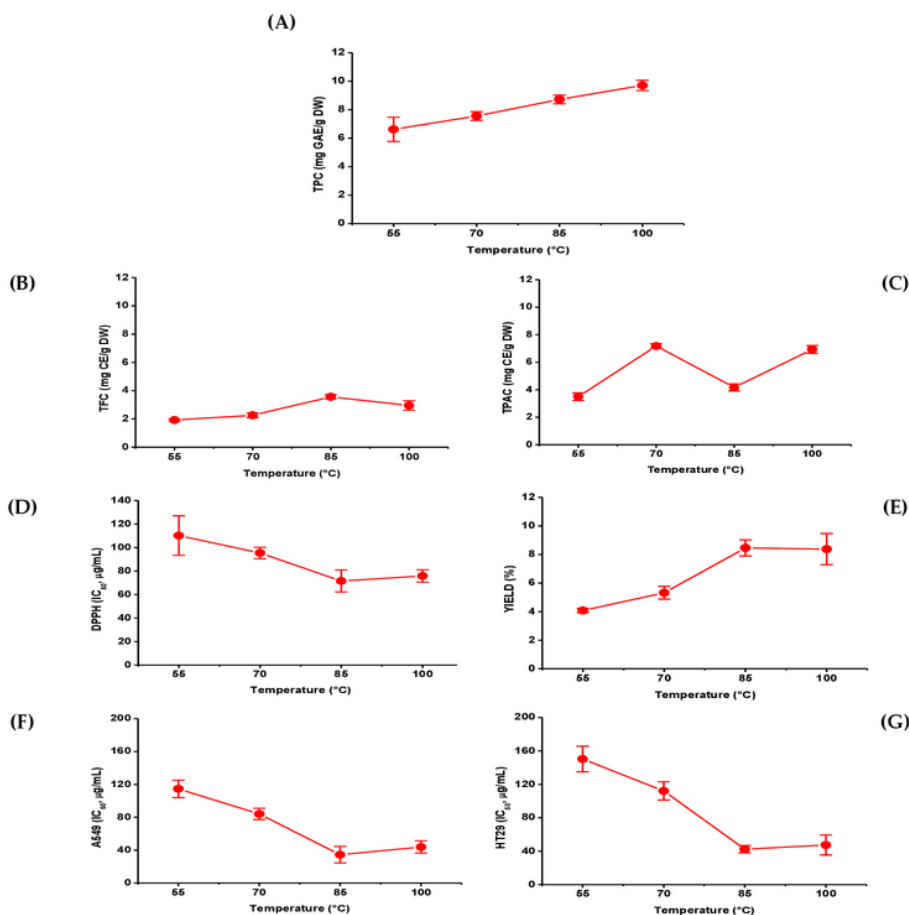

415 **Figure 3.** Effects of extraction temperature (°C) on (A) TPC, (B) TFC, (C) TPAC, (D) DPPH scavenging  
 416 capacity, (E) extracts yield and on the cytotoxicity of extracts in (F) A549 and (G) HT29 cells in non-  
 417 extractable polyphenols extracts from Barhi date palm kernels. Extraction was conducted under these  
 418 conditions; extraction time = 3 h and solvent/sample ratio = 20:1 mL/g.

### 419 3.2. Fitting the Response Surface Models

420 This study aimed to determine the experimental conditions for the optimisation of TPC, TFC,  
 421 and TPAC so as to maximise the bioactivity of the NEPP extract represented by the antioxidant  
 422 capacity and antiproliferative property using response surface methodology. Based on the results of  
 423 the one-factor-at-a time experiments (Figures; 1, 2 and 3), the levels of the three factors were  
 424 determined; extraction temperatures (70°C, 85°C and 100°C), solvent-to-sample ratio (15:1 mL/g, 20:1  
 425 mL/g and 25:1 mL/g) and extraction time (2h, 3h, and 4h) were selected for the RSM experiment. The  
 426 quadratic model from the FCCCD setup was used to generate a response surface image by identifying  
 427 the relationship between each of the seven evaluation indices and process variables; extraction  
 428 temperature (A), extraction time (B) and solvent/sample ratio (C), as well as to find out the conditions  
 429 that optimised the extraction process for maximum value of TPC, TFC, TPAC, extract yield and  
 430 minimum IC<sub>50</sub> (µg/mL) of cytotoxicity and DPPH radical scavenging capacity of NEPP from BDPK.  
 431 Hence, a quadratic model was selected and fitted well as suggested by the software for all three  
 432 independent variables and the seven response variables. The experimental design and corresponding  
 433 seven response variables are presented in Table 2.

**Table 2.** Central composite design matrix and corresponding responses

| Run | Independent variables |   |    | Responses (dependent variables) |                      |                       |                       |                    |                       |                       |  |  |  |  |  |  |
|-----|-----------------------|---|----|---------------------------------|----------------------|-----------------------|-----------------------|--------------------|-----------------------|-----------------------|--|--|--|--|--|--|
|     | A                     | B | C  | R <sub>1</sub> (TPC)            | R <sub>2</sub> (TFC) | R <sub>3</sub> (TPAC) | R <sub>4</sub> (DPPH) | R <sub>5</sub> (Y) | R <sub>6</sub> (A549) | R <sub>7</sub> (HT29) |  |  |  |  |  |  |
| 1   | 70                    | 4 | 25 | 10.66±0.3                       | 3.75±0.12            | 7.14±0.34             | 70.2±4.65             | 8.71±0.93          | 21.3±3.26             | 33.43±5.54            |  |  |  |  |  |  |
| 2   | 100                   | 4 | 25 | 10.61±0.07                      | 3.76±0.03            | 7.24±0.25             | 69.22±6.97            | 9.57±1.04          | 20.14±4.6             | 33.22±4.16            |  |  |  |  |  |  |
| 3   | 85                    | 3 | 20 | 10.83±0.78                      | 4.12±0.06            | 8.45±0.93             | 59.3±5.44             | 13.2±1.3           | 18.58±2.77            | 31.71±3.75            |  |  |  |  |  |  |
| 4   | 70                    | 4 | 15 | 10.75±0.52                      | 3.64±0.01            | 7.11±0.98             | 70.5±9.66             | 10.7±0.84          | 21.37±1.54            | 33.56±6.89            |  |  |  |  |  |  |
| 5   | 85                    | 3 | 25 | 10.79±0.36                      | 4.05±0.03            | 8.25±1.2              | 58.5±6.41             | 13.09±1.22         | 19.14±2.3             | 32.56±6.44            |  |  |  |  |  |  |
| 6   | 85                    | 3 | 15 | 10.77±0.11                      | 4.03±0.12            | 8.23±1.07             | 58.7±1.55             | 13.4±2.03          | 19.22±1.09            | 32.6±3.32             |  |  |  |  |  |  |
| 7   | 100                   | 2 | 15 | 10.67±0.9                       | 3.73±0.05            | 7.33±0.85             | 70.1±4.62             | 7.95±0.54          | 22.49±2.87            | 34.25±2.76            |  |  |  |  |  |  |
| 8   | 70                    | 2 | 15 | 10.59±0.47                      | 3.63±0.03            | 7.11±0.4              | 70.2±8.83             | 8.62±0.66          | 21.33±0.98            | 33.23±6.39            |  |  |  |  |  |  |
| 9   | 70                    | 2 | 25 | 10.69±0.25                      | 3.62±0.22            | 7.22±0.72             | 64.21±9.6             | 7.13±0.26          | 22.06±3.22            | 33.68±7.51            |  |  |  |  |  |  |
| 10  | 70                    | 3 | 20 | 10.72±0.66                      | 3.77±0.06            | 7.58±0.45             | 64.14±1.16            | 11.5±0.99          | 19.95±3.15            | 32.37±4.99            |  |  |  |  |  |  |
| 11  | 85                    | 3 | 20 | 10.83±0.08                      | 4.18±0.05            | 8.74±1.52             | 58.12±3.32            | 14±0.64            | 18.5±4.3              | 31.65±2.6             |  |  |  |  |  |  |
| 12  | 100                   | 3 | 20 | 10.75±0.1                       | 3.83±0.17            | 7.89±0.9              | 64.15±7.42            | 11.3±1.35          | 20.46±2.74            | 33.19±3.37            |  |  |  |  |  |  |
| 13  | 85                    | 4 | 20 | 10.79±0.36                      | 4.02±0.09            | 8.17±0.74             | 59.4±6.08             | 13.5±1.43          | 18.08±2.11            | 31.6±4.57             |  |  |  |  |  |  |
| 14  | 85                    | 3 | 20 | 10.8±0.55                       | 4.17±0.28            | 8.78±0.66             | 58.7±7.32             | 14.2±2.6           | 17.84±0.9             | 31.48±5.5             |  |  |  |  |  |  |
| 15  | 100                   | 4 | 15 | 10.68±0.45                      | 3.71±0.04            | 7.4±0.31              | 63.39±5.5             | 9.2±1.2            | 20.72±3.04            | 33.95±2.96            |  |  |  |  |  |  |
| 16  | 85                    | 2 | 20 | 10.78±0.52                      | 4.05±0.14            | 8.15±0.94             | 59.12±2.29            | 11.5±1.73          | 19.33±2.48            | 32.26±5.03            |  |  |  |  |  |  |
| 17  | 100                   | 2 | 25 | 10.79±0.76                      | 3.68±0.05            | 7.38±0.95             | 69.09±5.22            | 8.43±0.22          | 22.54±5.21            | 34.43±2.76            |  |  |  |  |  |  |

IC<sub>50</sub>, µg/ml was used to measure the capacity of non-extractable polyphenols (NEPP) from BDPK to neutralize 50% of DPPH free radicals. IC<sub>50</sub>, µg/ml was also used to measure the ability of NEPP from BDPK to inhibit cell growth of A549 and HT29 by half (50%). Abbreviations: A, temperature; B, time; C, solvent/sample ratio; TPC, total phenolic content; TFC, total flavonoid content; TPAC, total procyanthocyanidin content; DPPH, (2,2-diphenyl-1-picrylhydrazyl) radical scavenging activity; and Y, yield.

441  
442  
443  
444  
445  
446  
447  
448  
449  
450  
451  
452  
453  
454  
455  
456  
457  
458  
459  
460  
461  
462  
463  
464  
465  
466  
467  
468  
469  
470  
471  
472  
473  
474  
475  
476  
477  
478  
479  
480  
481  
482  
483  
484  
485  
486  
487  
488  
489  
490  
491

The statistical analysis of the quadratic models based on ANOVA is shown in Tables 3, 4, 5 and 6. The results indicated that the proposed models were significant ( $p < 0.0001$ ). The coefficient of determination ( $R^2$ ) were 0.9885, 0.9843, 0.9760, 0.9849, 0.9894, 0.9875 and 0.9887 for TPC, TFC, TPAC, yield, DPPH and cytotoxic effect on A549 and HT29, respectively, indicating that the model can predict ~99%, of the actual data for the responses. Whereas the adjusted coefficients of determination (Adj.  $R^2$ ) were 0.9738, 0.9641, 0.9451, 0.9655, 0.9759, 0.9714, and 0.9742, respectively revealed the high degree of correlation between the empirical and predicted values. To ascertain the model further, the lack of fit showed statistically-insignificant ( $p > 0.05$ ), indicating that all the established quadratic models were reliable and accurate for predicting the relevant responses.

Maximum recovery of TPC ( $10.83 \pm 0.08$ mg GAE/g DW) and TFC ( $4.18 \pm 0.05$ mg CE/g DW) was recorded during Run No. 11. Maximum extract yield of NEPP ( $14.2 \pm 2.6\%$ ) and TPAC ( $8.78 \pm 0.66$ mg CE/g DW) was recorded during Run No. 14. Minimum  $IC_{50}$  ( $\mu$ g/mL) of radical-scavenging capacity of DPPH was recorded at  $58.12 \pm 3.32$   $\mu$ g/mL during Run No. 11. The minimum  $IC_{50}$  ( $\mu$ g/mL) of cytotoxicity of NEPP from BDPK on A549 and HT29 were recorded at  $17.84 \pm 0.9$   $\mu$ g/mL and  $31.48 \pm 5.5$   $\mu$ g/mL during Run No. 5, respectively.

Multiple regression analysis was applied to the predicted data, and the software generated seven regression equations which demonstrated the predicted relationship between the responses and the three tested variables (Table 7), where  $R_1, R_2, R_3, R_4, R_5, R_6, R_7$  and  $R_8$  are the response values of TPC, TFC, TPAC, yield, DPPH and cytotoxicity on both A549 and HT29 cancer cells, respectively.

While A, B and C, are the coded values of the temperature, extraction time and solvent/sample ratio, respectively. A negative sign in each equation indicates an antagonistic effect of the variables, whereas a positive sign indicates synergistic effect of the independent variables [54].

For the extraction yield of TPC, TFC, TPAC, crude extract yield, DPPH radical scavenging activity and cytotoxicity, each response can be assigned a significant degree relative to the other responses. The results indicated that TPC ( $R_1$ ), TFC ( $R_2$ ) and TPAC ( $R_3$ ) were significantly influenced at ( $p < 0.05$ ) by temperature (A) and all quadratic terms ( $A^2, B^2, C^2$ ) (Table 3, 4 and 5). Moreover, interactions of AB and BC were significant ( $p < 0.001$ ) on TPC, while the three interactions of AB, AC and BC were not significant ( $p > 0.05$ ) on TFC and TPAC.

DPPH ( $R_4$ ) radical-scavenging capacity was not significantly influenced ( $p > 0.05$ ) by all three linear terms (A, B, C), while all interaction parameters (AB, AC, BC) and quadratic parameters ( $A^2, B^2, D^2$ ) were significant on ( $R_4$ ) (Table 4). Extract yield was significantly affected at ( $p < 0.05$ ) by linear (B, C), interaction parameter (AB) and all quadratic ( $A^2, B^2, C^2$ ) parameters (Table 5). The inhibitory effect of BDPK extract on A549 cancer cells was highly significant influenced at ( $p < 0.001$ ) by the linear (B), interaction parameter (AB) and quadratic parameters ( $A^2, B^2, D^2$ ) (Table 6). Whereas the inhibitory effect on HT29 cancer cells was influenced significantly at ( $p < 0.05$ ) by linear parameters (A and B). Additionally, two interactions of AB and BC were significant ( $p < 0.01$ ) on the viability of HT29 cancer cells, while only two quadratic parameters ( $A^2$  and  $C^2$ ) had an effect ( $p < 0.0001$ ) on the same cells (Table 6).

**Table 3.** ANOVA results for responses R1 and R2 (TPC and TFC) in NEPP extract from BDPK.

| Source               | Sum of Squares | Df | Mean Square | F Value | p-value | Source               | Sum of Squares | df | Mean Square | F Value | p-value |
|----------------------|----------------|----|-------------|---------|---------|----------------------|----------------|----|-------------|---------|---------|
| Model                | 0.086          | 9  | 9.536E-003  | 67.08   | <0.0001 | Model                | 0.64           | 9  | 0.071       | 48.81   | <0.0001 |
| A-Temp               | 8.100E-004     | 1  | 8.100E-004  | 5.70    | 0.0484  | A-Temp               | 9.000E-003     | 1  | 9.000E-003  | 6.14    | 0.0423  |
| B-Time               | 9.000E-005     | 1  | 9.000E-005  | 0.63    | 0.4524  | B-Time               | 2.890E-003     | 1  | 2.890E-003  | 1.97    | 0.2029  |
| C-                   | 6.400E-004     | 1  | 6.400E-004  | 4.50    | 0.0715  | C-                   | 1.440E-003     | 1  | 1.440E-003  | 0.98    | 0.3545  |
| Solvent/Sample ratio |                |    |             |         |         | solvent/sample ratio |                |    |             |         |         |
| AB                   | 0.011          | 1  | 0.011       | 79.13   | <0.0001 | AB                   | 8.000E-004     | 1  | 8.000E-004  | 0.55    | 0.4839  |
| AC                   | 2.000E-004     | 1  | 2.000E-004  | 1.41    | 0.2743  | AC                   | 1.250E-003     | 1  | 1.250E-003  | 0.85    | 0.3863  |
| BC                   | 0.018          | 1  | 0.018       | 126.96  | <0.0001 | BC                   | 6.050E-003     | 1  | 6.050E-003  | 4.13    | 0.0816  |
| A^2                  | 0.016          | 1  | 0.016       | 112.06  | <0.0001 | A^2                  | 0.25           | 1  | 0.25        | 171.33  | <0.0001 |
| B^2                  | 1.970E-003     | 1  | 1.970E-003  | 13.85   | 0.0074  | B^2                  | 0.014          | 1  | 0.014       | 9.23    | 0.0189  |
| C^2                  | 2.763E-003     | 1  | 2.763E-003  | 19.43   | 0.0031  | C^2                  | 0.012          | 1  | 0.012       | 7.98    | 0.0256  |
| Residual             | 9.952E-004     | 7  | 1.422E-004  |         |         | Residual             | 0.010          | 7  | 1.465E-003  |         |         |
| Lack of Fit          | 3.952E-004     | 5  | 7.904E-005  | 0.26    | 0.9006  | Lack of Fit          | 8.187E-003     | 5  | 1.637E-003  | 1.58    | 0.4303  |
| Pure Error           | 6.000E-004     | 2  | 3.000E-004  |         |         | Pure Error           | 2.067E-003     | 2  | 1.033E-003  |         |         |
| Cor Total            | 0.087          | 16 |             |         |         | Cor Total            | 0.65           | 16 |             |         |         |

495  $R^2=0.9885$ , adj.  $R^2=0.9738$  and pred.  $R^2=0.9592$  (TPC)  $R^2=0.9843$ , adj.  $R^2=0.9641$  and pred.  $R^2=0.9287$  (TFC) adj., adjusted; pred., predicted; ANOVA,  
496 analysis of variance; TPC, total phenolic content; TFC, total flavonoid content; NEPP, non-extractable polyphenols.

497  
498**Table 4.** ANOVA results for response R3 and R4 (TPAC and DPPH) of NEPP extract.

| Source                 | Sum of Squares | df | Mean Square | F Value    | p-value | Source                 | Sum of Squares | df | Mean Square | F Value    | p-value |
|------------------------|----------------|----|-------------|------------|---------|------------------------|----------------|----|-------------|------------|---------|
| Model                  | 5.42           | 9  | 0.60        | 31.61      | <0.0001 | Model                  | 391.96         | 9  | 43.55       | 50.70      | <0.0001 |
| A-Temp                 | 0.12           | 1  | 0.12        | 6.12       | 0.0426  | A-Temp                 | 1.09           | 1  | 1.09        | 1.27       | 0.2973  |
| B-Time                 | 1.690E-003     | 1  | 1.690E-003  | 0.089      | 0.7745  | B-Time                 | 1.000E-005     | 1  | 1.000E-005  | 1.164E-005 | 0.9974  |
| C-solvent/sample ratio | 2.500E-004     | 1  | 2.500E-004  | 0.013      | 0.9120  | C-solvent/sample ratio | 0.28           | 1  | 0.28        | 0.32       | 0.5866  |
| AB                     | 1.250E-005     | 1  | 1.250E-005  | 6.559E-004 | 0.9803  | AB                     | 20.70          | 1  | 20.70       | 24.10      | 0.0017  |
| AC                     | 7.813E-003     | 1  | 7.813E-003  | 0.41       | 0.5424  | AC                     | 15.43          | 1  | 15.43       | 17.96      | 0.0038  |
| BC                     | 0.011          | 1  | 0.011       | 0.55       | 0.4818  | BC                     | 19.63          | 1  | 19.63       | 22.85      | 0.0020  |
| A^2                    | 1.53           | 1  | 1.53        | 80.40      | <0.0001 | A^2                    | 128.52         | 1  | 128.52      | 149.62     | <0.0001 |
| B^2                    | 0.29           | 1  | 0.29        | 15.42      | 0.0057  | B^2                    | 11.16          | 1  | 11.16       | 12.99      | 0.0087  |
| C^2                    | 0.17           | 1  | 0.17        | 8.87       | 0.0206  | C^2                    | 5.11           | 1  | 5.11        | 5.95       | 0.0448  |
| Residual               | 0.13           | 7  | 0.019       |            |         | Residual               | 6.01           | 7  | 0.86        |            |         |
| Lack of Fit            | 0.069          | 5  | 0.014       | 0.42       | 0.8108  | Lack of Fit            | 5.32           | 5  | 1.06        | 3.05       | 0.2648  |
| Pure Error             | 0.065          | 2  | 0.032       |            |         | Pure Error             | 0.70           | 2  | 0.35        |            |         |
| Cor>Total              | 5.55           | 16 |             |            |         | Cor>Total              | 397.97         | 16 |             |            |         |

499

R<sup>2</sup>= 0.9760, adj. R<sup>2</sup>= 0.9451, pred. R<sup>2</sup>= 0.9222 (TPAC); R<sup>2</sup>= 0.9655, pred. R<sup>2</sup>= 0.9341 (DPPH)

500

adj., adjusted; pred., predicted; ANOVA, analysis of variance; TPAC, total proanthocyanidin content; DPPH, (2,2-diphenyl-2-picrylhydrazyl) radical scavenging activity; IC50, concentration of a substance/antioxidant required to inhibit DPPH radical by half (50%); NEPP, non-extractable polyphenols.

501

**Table 5.** ANOVA results for response R5 (YIELD) of NEPP extract.

| Source                 | Sum of Squares | df | Mean Square | F Value | p-value  |
|------------------------|----------------|----|-------------|---------|----------|
| Model                  | 87.23          | 9  | 9.69        | 72.85   | < 0.0001 |
| A-Temp                 | 4.410E-003     | 1  | 4.410E-003  | 0.033   | 0.8607   |
| B-Time                 | 6.48           | 1  | 6.48        | 48.71   | 0.0002   |
| C-solvent/sample ratio | 0.86           | 1  | 0.86        | 6.50    | 0.0382   |
| AB                     | 0.20           | 1  | 0.20        | 1.52    | 0.2581   |
| AC                     | 2.34           | 1  | 2.34        | 17.62   | 0.0041   |
| BC                     | 0.047          | 1  | 0.047       | 0.35    | 0.5729   |
| A <sup>2</sup>         | 19.51          | 1  | 19.51       | 146.62  | < 0.0001 |
| B <sup>2</sup>         | 6.84           | 1  | 6.84        | 51.44   | 0.0002   |
| C <sup>2</sup>         | 1.95           | 1  | 1.95        | 14.66   | 0.0065   |
| Residual               | 0.93           | 7  | 0.13        |         |          |
| Lack of Fit            | 0.37           | 5  | 0.074       | 0.27    | 0.8996   |
| Pure Error             | 0.56           | 2  | 0.28        |         |          |
| Cor Total              | 88.16          | 16 |             |         |          |
| Model                  | 87.23          | 9  | 9.69        | 72.85   | < 0.0001 |
| A-Temp                 | 4.410E-003     | 1  | 4.410E-003  | 0.033   | 0.8607   |
| B-Time                 | 6.48           | 1  | 6.48        | 48.71   | 0.0002   |
| C-solvent/sample ratio | 0.86           | 1  | 0.86        | 6.50    | 0.0382   |
| AB                     | 0.20           | 1  | 0.20        | 1.52    | 0.2581   |

503  
504  
505  
506  
507  
508  
509  
510  
511  
512  
513  
514  
515  
516  
517  
518  
519  
520  
521  
522

 $R^2 = 0.9894$ , adj.  $R^2 = 0.9759$  and pred.  $R^2 = 0.9622$ .

adj., adjusted; pred., predicted; ANOVA, analysis of variance; NEPP, non-extractable polyphenols.

**Table 6.** ANOVA results for response R6 and R7 (IC50 concentration of NEPP on A549 and HT29 cancer cells).

| Source                 | Sum of Squares | df | Mean Square | F Value    | p-value  | Source                 | Sum of Squares | df | Mean Square | F Value | p-value  |
|------------------------|----------------|----|-------------|------------|----------|------------------------|----------------|----|-------------|---------|----------|
| Model                  | 36.39          | 9  | 4.04        | 61.39      | < 0.0001 | Model                  | 14.30          | 9  | 1.59        | 68.18   | < 0.0001 |
| A-Temp                 | 0.012          | 1  | 0.012       | 0.18       | 0.6878   | A-Temp                 | 0.77           | 1  | 0.77        | 32.92   | 0.0007   |
| B-Time                 | 3.77           | 1  | 3.77        | 57.24      | 0.0001   | B-Time                 | 0.44           | 1  | 0.44        | 18.74   | 0.0034   |
| C-solvent/sample ratio | 2.500E-004     | 1  | 2.500E-004  | 3.796E-003 | 0.9526   | C-solvent/sample ratio | 7.290E-003     | 1  | 7.290E-003  | 0.31    | 0.5934   |
| AB                     | 1.49           | 1  | 1.49        | 22.59      | 0.0021   | AB                     | 0.32           | 1  | 0.32        | 13.56   | 0.0078   |
| AC                     | 0.18           | 1  | 0.18        | 2.69       | 0.1451   | AC                     | 0.095          | 1  | 0.095       | 4.06    | 0.0838   |
| BC                     | 0.26           | 1  | 0.26        | 3.88       | 0.0895   | BC                     | 0.28           | 1  | 0.28        | 11.91   | 0.0107   |
| A^2                    | 9.72           | 1  | 9.72        | 147.63     | < 0.0001 | A^2                    | 2.85           | 1  | 2.85        | 122.13  | < 0.0001 |
| B^2                    | 0.44           | 1  | 0.44        | 6.67       | 0.0363   | B^2                    | 0.088          | 1  | 0.088       | 3.76    | 0.0938   |
| C^2                    | 2.08           | 1  | 2.08        | 31.51      | 0.0008   | C^2                    | 1.85           | 1  | 1.85        | 79.33   | < 0.0001 |
| Residual               | 0.46           | 7  | 0.066       |            |          | Residual               | 0.16           | 7  | 0.023       |         |          |
| Lack of Fit            | 0.13           | 5  | 0.026       | 0.16       | 0.9568   | Lack of Fit            | 0.13           | 5  | 0.027       | 1.89    | 0.3808   |
| Pure Error             | 0.33           | 2  | 0.16        |            |          | Pure Error             | 0.028          | 2  | 0.014       |         |          |
| Cor Total              | 36.85          | 1  |             |            |          | Cor Total              | 14.47          | 1  |             |         |          |
|                        |                | 6  |             |            |          |                        |                | 6  |             |         |          |
| Model                  | 36.39          | 9  | 4.04        | 61.39      | < 0.0001 | Model                  | 14.30          | 9  | 1.59        | 68.18   | < 0.0001 |
| A-Temp                 | 0.012          | 1  | 0.012       | 0.18       | 0.6878   | A-Temp                 | 0.77           | 1  | 0.77        | 32.92   | 0.0007   |
| B-Time                 | 3.77           | 1  | 3.77        | 57.24      | 0.0001   | B-Time                 | 0.44           | 1  | 0.44        | 18.74   | 0.0034   |
| C-solvent/sample ratio | 2.500E-004     | 1  | 2.500E-004  | 3.796E-003 | 0.9526   | C-solvent/sample ratio | 7.290E-003     | 1  | 7.290E-003  | 0.31    | 0.5934   |
| AB                     | 1.49           | 1  | 1.49        | 22.59      | 0.0021   | AB                     | 0.32           | 1  | 0.32        | 13.56   | 0.0078   |

$R^2=0.9875$ , adj.  $R^2=0.9714$  pred.  $R^2=0.9560$  (A549);  $R^2=0.9887$ , adj.  $R^2=0.9742$  pred.  $R^2=0.9184$  (HT29); adj., adjusted; pred., predicted; ANOVA, analysis of variance; IC<sub>50</sub>, concentration of a substance/treatment required to inhibit cell growth by half (50%); NEPP, non-extractable polyphenols.

526

**Table 7.** Quadratic equations for the seven responses in terms of coded factors.

| Responses                                      | Equations                                                                                                                                                            |
|------------------------------------------------|----------------------------------------------------------------------------------------------------------------------------------------------------------------------|
| (R <sub>1</sub> ) TPC                          | +10.82 +9.000E-003*A - 3.000E-003*B + 8.000E-003*C - 0.037*A*B + 5.000E-003*A*C - 0.047*B*C - 0.077*A <sup>2</sup> - 0.027*B <sup>2</sup> - 0.032*C <sup>2</sup> (1) |
| (R <sub>2</sub> ) TFC                          | +4.13 + 0.030*A + 0.017*B + 0.012*C - 0.010*A*B - 0.013*A*C + 0.027*B*C - 0.31*A <sup>2</sup> - 0.071*B <sup>2</sup> - 0.066*C <sup>2</sup> (2)                      |
| (R <sub>3</sub> ) TPAC                         | +8.56 + 0.11*A - 0.013*B + 5.000E - 003*C + 1.250E - 003*A*B - 0.031*A*C - 0.036*B*C - 0.76*A <sup>2</sup> - 0.33*B <sup>2</sup> - 0.25*C <sup>2</sup> (3)           |
| (R <sub>4</sub> ) DPPH SAC (IC <sub>50</sub> ) | +57.86 - 0.33*A - 1.000E-003*B - 0.17*C - 1.61*A*B + 1.39*A*C + 1.57*B*C + 6.93*A <sup>2</sup> + 2.04*B <sup>2</sup> + 1.38*C <sup>2</sup> (4)                       |
| (R <sub>5</sub> ) Extraction Yield             | +13.97 - 0.021*A + 0.80*B - 0.29*C - 0.16*A*B + 0.54*A*C - 0.076*B*C - 2.70*A <sup>2</sup> - 1.60*B <sup>2</sup> - 0.85*C <sup>2</sup> (5)                           |
| (R <sub>6</sub> ) A549 (IC <sub>50</sub> )     | +18.30 + 0.034*A - 0.61*B + 5.000E - 003*C - 0.43*A*B - 0.15*A*C - 0.18*B*C + 1.91*A <sup>2</sup> + 0.41*B <sup>2</sup> + 0.88*C <sup>2</sup> (6)                    |
| (R <sub>7</sub> ) HT29 (IC <sub>50</sub> )     | +31.69 + 0.28*A - 0.21*B - 0.027*C - 0.20*A*B - 0.11*A*C - 0.19*B*C + 1.03*A <sup>2</sup> + 0.18*B <sup>2</sup> + 0.83*C <sup>2</sup> (7)                            |

In these equations, R is the predicted response, A, B and C are the values of the independent variables, extraction temperature (°C), extraction time (h) and solvent/sample ratio (mL/g), respectively.

527

528

529 3.3. Optimisation by RSM

530 RSM plays a key role in efficiently identification of the optimum values of the independent  
531 variables. Three-dimensional response surface plots were proposed to depict the individual or  
532 interactive effects of these three selective parameters on the response variables, namely; extraction  
533 yield of NEPP (TPC, TFC, TPAC), crude extract yield, and its DPPH radical scavenging activity and  
534 its antiproliferative effect on two human cancer cells; A549 and HT29, respectively (Figure 4, 5, 6, 7,  
535 8, 9, 10).

536 In the response surface plot and contour plot, the extraction yield of NEPP was obtained along  
537 with two continuous independent variables with their coded terms obtained from RSM, while the  
538 other independent variable was fixed constant at its zero level (the centre value of the test ranges).  
539 The centre value of the test ranges, namely; (3h, extraction time), (20:1 mL/g, solvent-to-sample ratio),  
540 (85°C, extraction temperature), and were chosen from previous single-factor experiments, and were  
541 selected for the RSM experiment.

542 To determine the optimum extraction conditions for NEPP; TPC, TFC, TPAC; percentage yield  
543 of crude extract; antioxidant and cytotoxic recovery from BDPK using acid hydrolysis method, the  
544 extraction process was conducted at different extraction time, temperature, and liquid/ solid ratio.  
545 The response surface plots predicting the specific surface area of NEPP extraction by the acid  
546 hydrolysis versus levels of the independent variables are presented in Table 2. The effect of  
547 investigated extraction parameters on each evaluated response was expressed as significant ( $p < 0.05$ )  
548 or insignificant ( $p > 0.05$ ) according to P values for the regression coefficients in the quadratic model  
549 (Table 3, 4, 5, 6).

550 3.3.1. Response Surface Analysis of Total Phenolic Content

551 The analysis variance of total phenolic content (TPC) is noticed to be significantly ( $p < 0.05$ )  
552 affected by the linear and quadratic effects of the extraction temperature. It was found that the linear  
553 term of extraction temperature had a positive linear effect on TPC while showing a negative quadratic  
554 effect, contributing to a saddled shape. TPC increased when temperature increased to reach an  
555 optimum of 87°C. the beneficial effect of temperature on the extraction efficiency of phenolic  
556 compounds was reported in many studies [49,55,56]. It ameliorates the mass transfer, weakens the  
557 cell wall integrity, hydrolyses the bonds of bound phenolic compounds (phenol-protein or phenol  
558 polysaccharide), improves the solubilisation of the solutes in the solvent and reduces the surface  
559 tension and viscosity, thus more phenolics would distribute to the solvent [57,58].

560 Nevertheless, and beyond a certain value, some antioxidants like some phenolic compounds can  
561 be denatured by chemical reactions [59]. This limit temperature is different amongst extraction  
562 studies; it is 73.9°C for some [26] or up to 63 °C [60], and 94 °C for others [55]. Regarding the duration  
563 of the extraction process, short [61,62] and long extraction periods can be proposed in the literature  
564 [26,63]. The present study showed a negative quadratic effect of time on the TPC as shown in Table  
565 7, equation (1), which indicates that TPC increased with increasing extraction time to a certain level  
566 (approximately 2.7 h). However, further increase in extraction time shows decrease in TPC. The  
567 obtained results in this study were contrary to that obtained by El Hajj, *et al.* [64] who found that the  
568 extraction of total phenolics from cabernet sauvignon grapes (*Vitisvinifera* L.) increased with the  
569 increase of time. This contradiction is probably due to the working high temperatures employed in  
570 this study, which required short periods of time to avoid the possible polyphenols degradation.

571 The results in this study are similar to another study performed on grape by-products, and  
572 showed that the increase in the extraction temperature led to an increase in total phenolics from  
573 grape by-products and reduction of time [55]. In the current study, the interaction between the  
574 extraction time and extraction temperature had a highly significant ( $p < 0.0001$ ) effect on TPC (Figure  
575 4A). In other terms, extraction temperature influenced TPC synergistically with the extraction time.  
576 Similarly, there was an interaction between extraction time and sample/solvent ratio ( $p < 0.0001$ ),  
577 which indicates that there was a synergistic interaction between extraction time and sample/solvent

578 ratio on the yield of TPC (Figure 4C). However, the interaction between extraction temperature and  
 579 sample/solvent ratio was not significant ( $p > 0.05$ ) indicating that temperature worked independently  
 580 of the sample/solvent ratio (Table 3 and Figure 4B).

### 581 3.3.2. Response Surface Analysis of Total Flavonoid and Proanthocyanidin Contents

582 Flavonoids and proanthocyanidins are the most abundant polyphenols in human diets.  
 583 Experimental results of TFC and TPAC in Barhi date palm kernels extracts are presented in Table 2.  
 584 TFC was between  $3.62 \pm 0.22$  mg catechin (CE) per g dry weight (DW), obtained with  $70^\circ\text{C}$   
 585 temperature, 2 h time and 25:1 (mL/g) solvent/sample ratio, and  $4.18 \pm 0.05$  mg CE per g DW, obtained  
 586 with  $85^\circ\text{C}$ , 3 h and 20:1 mL/g sample/solvent ratio.  
 587

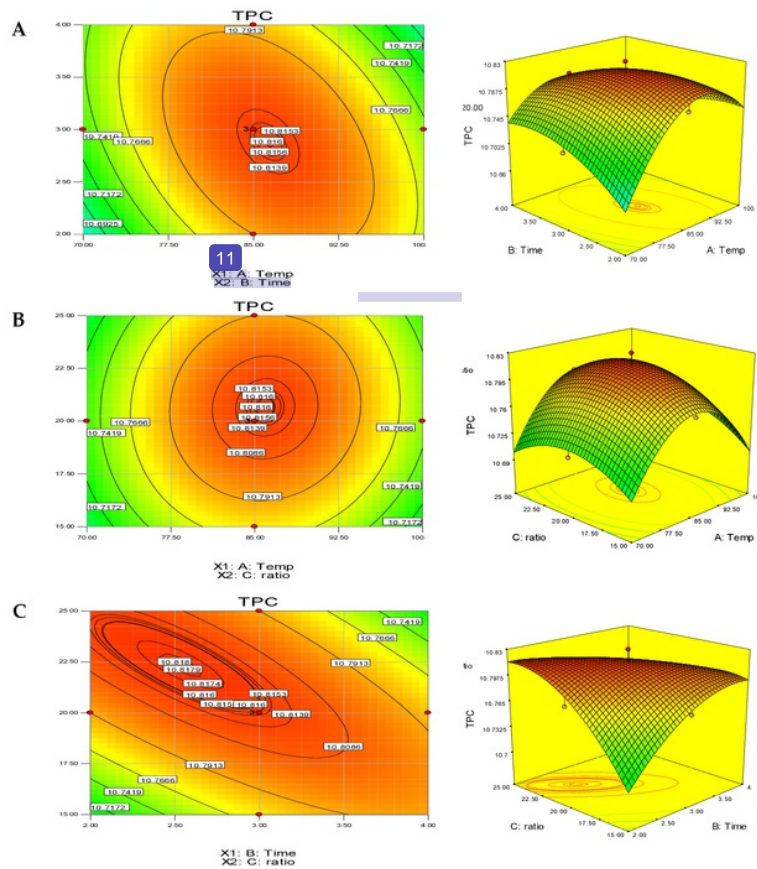

588 **Figure 4.** Response surface plots and contour plots for the effect of temperature and time (A);  
 589 temperature and solvent/sample ratio (B); time and solvent/sample ratio (C) on the non-extractable  
 590 total phenolic content (TPC, mg GAE/g DW) of BDPK.

591 Lower TPAC yields ( $7.11 \pm 0.4$  mg CE per g DW) were obtained using  $70^\circ\text{C}$ , 2 h and 15:1 mL/g,  
 592 while the highest TPAC yields ( $8.78 \pm 0.66$  mg CE per g DW) were obtained with  $85^\circ\text{C}$ , 3 h and 20:1  
 593 mL/g sample/solvent ratio as was the case with TFC (Table 2).

594 There was a good correlation ( $r = 0.748$ ) and ( $r = 0.807$ ) respectively, observed between  
 595 experimentally obtained TFC and TPC, and strong correlation ( $r = 0.972$ ) observed between TFC and  
 596 TPAC suggesting that similar extraction parameters provide good extraction of both groups of  
 597 compounds (Table 8). Moreover, the good negative correlation was observed between TPC, TFC,  
 598 TPAC and ( $\text{IC}_{50}$ ) of DPPH radical scavenging activity (0.735, 0.874, 0.907, respectively), which means

599 that IC<sub>50</sub> decrease, i.e. antioxidant activity increases, with increasing TPC, TFC and TPAC. This  
600 suggests that NEPP play an important role in the antioxidant activity of BDPK.

601 It can be seen that only the linear term of extraction temperature and the quadratic terms of  
602 extraction temperature, time and sample/solvent ratio had a significant influence ( $p < 0.05$ ) on TFC,  
603 while all other effects were insignificant ( $p > 0.05$ ). The same situation was observed for TPAC  
604 extractions, as confirmed by a strong correlation ( $r = 0.972$ ) (Table 8).  
605

606 **Table 8.** Correlation coefficients between the antioxidant and cytotoxicity capacity of NEPP extract from  
607 BDPK and the total content of phenolic, flavonoid, proanthocyanidin, and extract yield.

| Factor | Responses |        |          |           |           |                                    |                                    |
|--------|-----------|--------|----------|-----------|-----------|------------------------------------|------------------------------------|
|        | TPC       | TFC    | TPAC     | DPPH      | YIELD     | A549 (IC <sub>50</sub> ,<br>µg/mL) | HT29 (IC <sub>50</sub> ,<br>µg/mL) |
| TPC    | 1.000     | 0.748* | 0.807*** | -0.735*   | 0.752*    | -0.594*                            | -0.585*                            |
| TFC    |           | 1.000  | 0.972*** | -0.874*** | 0.901***  | -0.902***                          | -0.866***                          |
| TPAC   |           |        | 1.000    | -0.907*** | 0.903***  | -0.874***                          | -0.842***                          |
| DPPH   |           |        |          | 1.000     | -0.816*** | 0.964***                           | 0.789***                           |
| YIELD  |           |        |          |           | 1.000     | -0.933***                          | -0.888***                          |
| A549   |           |        |          |           |           | 1.000                              | –                                  |
| HT29   |           |        |          |           |           |                                    | 1.000                              |

608 TPC, , total phenolic content; TFC, total flavonoid content; TPAC, total proanthocyanidin content;  
609 DPPH, (2,2-diphenyl-2-picrylhydrazyl) radical scavenging activity; IC<sub>50</sub>, concentration of a  
610 substance/antioxidant required to inhibit DPPH radical by half (50%); NEPP, non-extractable  
611 polyphenols. \* $p < 0.01$ , \*\*\* $p < 0.0001$ .  
612

613  
614 The linear term of extraction temperature exhibited a positive effect on TFC and TPAC, which  
615 means that high temperature, is necessary for complete flavonoid and proanthocyanidin extractions  
616 (Figure 5, 6). The negative effect of the quadratic terms of temperature, time and solvent/sample ratio  
617 suggested that TFC and TPAC reaches a maximum near lower level of extraction parameters and  
618 then starts to decrease rapidly with more heating, prolonged time, increasing solvent ratio with a  
619 saddle point between lower and middle levels of these parameters.

### 620 3.3.3. Response Surface Analysis of Crude Extract Yield

621 The results in this study are similar to another study performed on grape by-products, and  
622 showed that the total phenolics from grape by-products increased with the increment of temperature  
623 and reduction of time [55]. In the current study, the interaction between the extraction time and  
624 extraction temperature had a highly significant ( $p < 0.0001$ ) effect on TPC (Figure 4A). In other terms,  
625 extraction temperature influenced TPC synergistically with the extraction time. Similarly, there was  
626 an interaction between extraction time and sample/solvent ratio ( $p < 0.0001$ ), which indicates that  
627 there was a synergistic interaction between extraction time and sample/solvent ratio on the yield of  
628 TPC (Figure 4C). However, the interaction between extraction temperature and sample/solvent  
629 ratio was not significant ( $p > 0.05$ ) indicating that temperature worked independently of the  
630 sample/solvent ratio (Table 3 and Figure 4B).

631 The crude extract (NEPP) was weighted to determine the crude extract yield. The extraction  
632 yield (% *w/w*) from each condition was estimated by the ratio of the weight of dry matter of BDPK  
633 after being extracted by acid hydrolysis to the weight of total dry matters before extraction.

634 Various factors showed significant effects on the NEPP extraction yield. Based on the  
635 experimental data illustrated in Table 5, total extracted yield ranged from 7.13±0.26 % (70°C, 2h, 25:1

636 mL/g) to  $14.2 \pm 2.6$  % (85°C, 3h, 20:1 mL/g) (Table 5). The effect of different independent variables on  
637 the yield was described in equation 5, Table 7. Based on the ANOVA test, the most significant factor  
638 ( $p < 0.001$ ,  $F = 48.71$ ) affecting the obtained yield was the positive effect of time in its linear term (Table  
639 7, equation 5). It is concluded that longer extraction time had positive effects on the yield of extraction.

640 There were also significant ( $p < 0.01$ ) positive interaction effects of extraction time and solvent to  
641 sample ratio (equation 5, Table 7), indicating that yield extraction increases considerably with an  
642 increase in a solvent to sample ratio and extraction time (Figure 7B). Table 7 and equation 5,  
643 demonstrated negative quadratic effects of temperature, time and solvent to sample ratio on extract  
644 yield.

645 These observations indicate that the extraction yield increases when the independent variables  
646 are in their middle values (Figure 7A, B, C), however, a further increase in these variables led to the  
647 decline of crude extract yield from BDPK. The linear negative effect of solvent to sample ratio was  
648 significant ( $p < 0.05$ ), indicating that increasing the solvent to sample ratio favours extraction of NEPP  
649 only up to a certain value (20:1 mL/g). At higher solvent to sample ratio, the crude extract yield of  
650 NEPP decreased. Also, a high correlation between NEPP crude extract yield and TPC, TFC, TPAC  
651 and antioxidant and cytotoxic activities of the extracts in the DPPH and MTT assays were found. The  
652 Pearson's correlation coefficients ( $r$ ) of extract yield with TPC, TFC, TPAC were 0.752, 0.901 and 0.903,  
653 respectively, and the coefficients ( $r$ ) of extract yield with  $IC_{50}$  for DPPH and MTT for A549 and HT29  
654 were -0.816, -0.933 and -0.888, respectively. These good correlation observed between  
655 experimentally obtained TPC, TFC, TPAC and NEPP crude extract yield, suggesting that similar  
656 extraction parameters provide good extraction of these groups of compounds (Table 8). Moreover,  
657 the good negative correlation was observed between crude extract yield and antioxidant and  
658 cytotoxic activities parameters ( $IC_{50}$ ), which means that as  $IC_{50}$  decrease as antioxidant and cytotoxic  
659 activities increases, with increasing the yield of NEPP.

660  
661  
662  
663  
664  
665  
666  
667  
668  
669  
670  
671  
672  
673  
674  
675  
676  
677  
678  
679  
680  
681

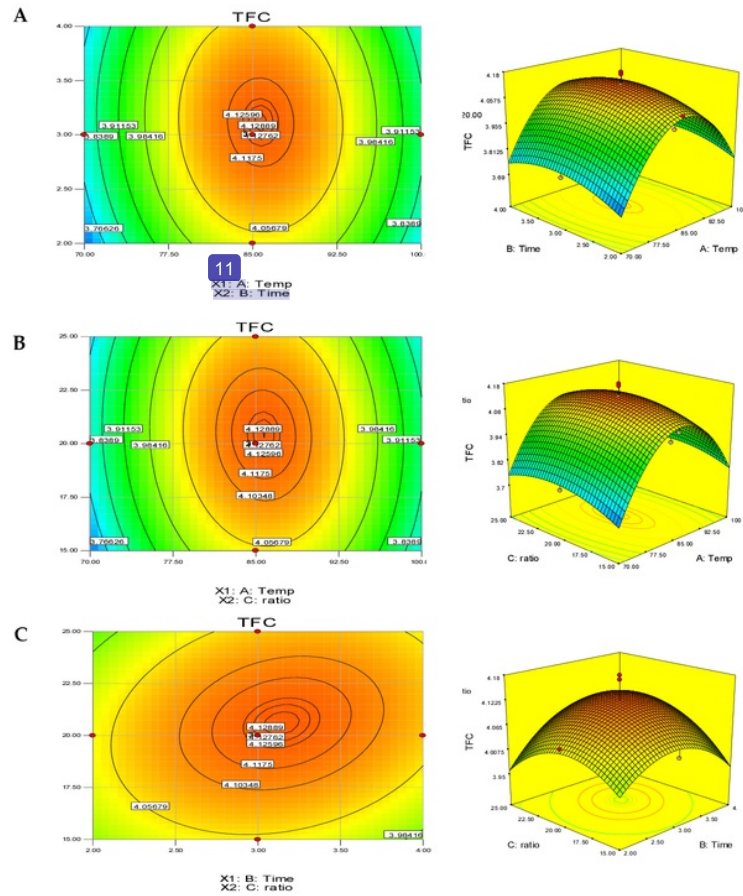

682 **Figure 5.** Response surface plots and contour plots for the effect of temperature and time (A);  
683 temperature and solvent/sample ratio (B); time and solvent/sample ratio (C) on the non-extractable  
684 total flavonoid content (TFC, mg CE/g DW) of BDPK.

685  
686  
687  
688  
689  
690  
691  
692  
693  
694  
695  
696  
697  
698  
699  
700  
701  
702

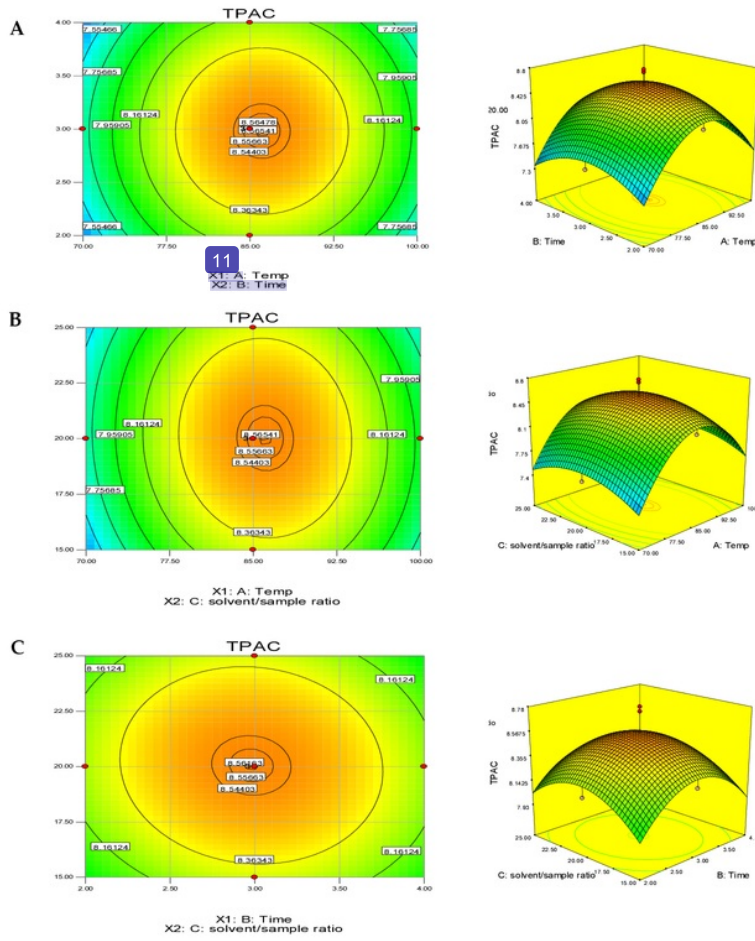

703  
704  
705

**Figure 6.** Response surface plots and contour plots for the effect of temperature and time (A); temperature and solvent/sample ratio (B); time and solvent/sample ratio (C) on the non-extractable total proanthocyanidin content (TPAC, mg CE/g DW) of BDPK.

706  
707  
708  
709  
710  
711  
712  
713  
714  
715  
716  
717  
718  
719  
720  
721  
722

723  
724  
725  
726  
727  
728  
729  
730  
731  
732  
733  
734  
735  
736  
737  
738  
739  
740  
741  
742  
743  
744  
745  
746  
747  
748  
749  
750  
751  
752  
753  
754  
755  
756  
757

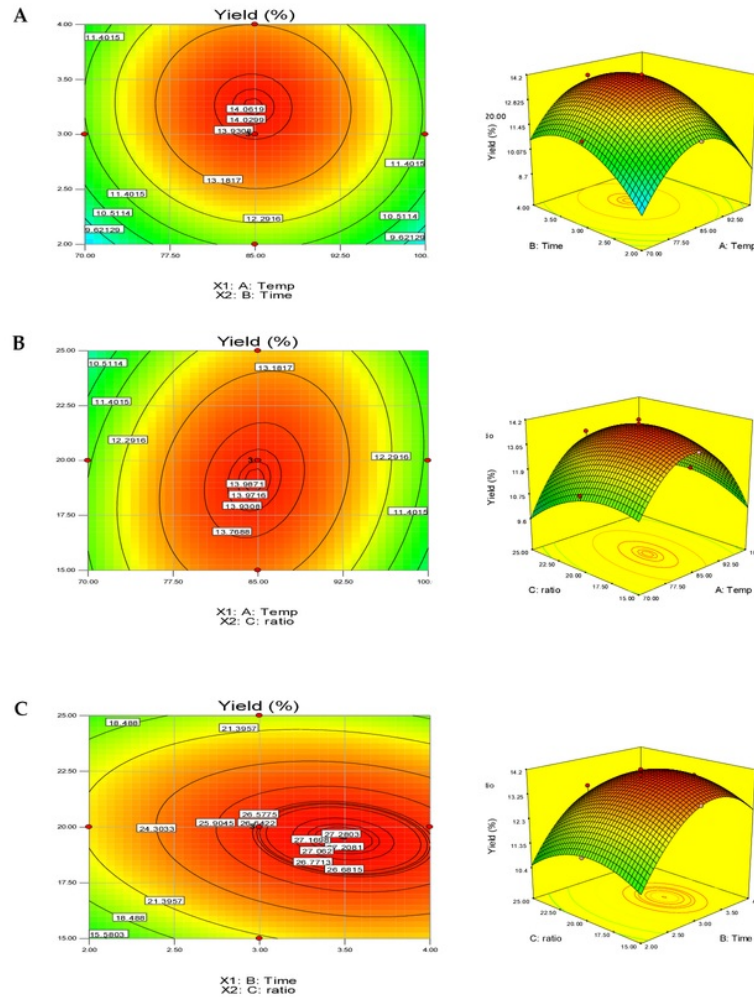

758 **4** **Figure 7.** Response surface plots and contour plots for the effect of temperature and time (A);  
759 temperature and solvent/sample ratio (B); time and solvent/sample ratio (C) on the non-extractable  
760 polyphenols crude extract (%) of BDPK.

761 3.3.4. Response Surface Analysis of DPPH Radical Scavenging Activity

762 Current research on dietary antioxidants misses the so-called non-extractable polyphenols  
763 (NEPP), which are not significantly released from the food matrix either by mastication, acid pH in  
764 the stomach or action of digestive enzymes, reaching the colon nearly intact. NEPP, not detected by  
765 the usual analytical procedures, are made up of macromolecules and single phenolic compounds  
766 associated with macromolecules. Therefore, NEPP is not included in food and dietary intake data  
767 nor in bioavailability, intervention or observational studies. DPPH radical scavenging capacity of  
768 BDPK's NEPP extracts was evaluated by DPPH assay, which is widely used in evaluating the  
769 antioxidant activity of plant polyphenols *in-vitro* [65]. IC<sub>50</sub>, as a reciprocal measure of DPPH radicals  
770 scavenging capacity of BDPK extracts, ranged between 58.12±3.29 and 70.5±9.66 µg/mL. The lowest  
771 IC<sub>50</sub>, i.e. highest DPPH radical scavenging capacity of NEPP, was found to be a function of the  
772 positive quadratic effect ( $p < 0.05$ ) of all independent variables (temperature, time, solvent/sample

773 ratio). The positive effect of the quadratic terms of all parameters means that antioxidant activity will  
 774 decrease significantly at a higher level of these variables.

775 Furthermore, none of the linear terms of independent variables had a significant effect ( $p > 0.05$ )  
 776 on DPPH. On the other hand, the interaction between extraction temperature and time had a  
 777 significant negative effect ( $p < 0.05$ ) on  $IC_{50}$  suggesting that higher antioxidant activity will be  
 778 preserved when temperature and time (85°C and 3 h, respectively) are in their middle levels (Figure  
 779 7A, B). Moreover, the interaction between extraction temperature and solvent/sample ratio and the  
 780 interaction between time and solvent/sample ratio had a significant positive effect ( $p < 0.05$ ) on  $IC_{50}$ ,  
 781 suggesting that DPPH radical scavenging activity will be decreased at a higher level of these  
 782 variables (Figure 8A, B). There was a significant ( $p < 0.01$ ) negative correlation between DPPH and  
 783 NEPP (TPC, TFC, and TPAC) (Table 8). To the best of our knowledge, no other study has been  
 784 conducted on the DPPH radical scavenging activity of NEPP in date palm kernels using acidic  
 785 hydrolysis.

786

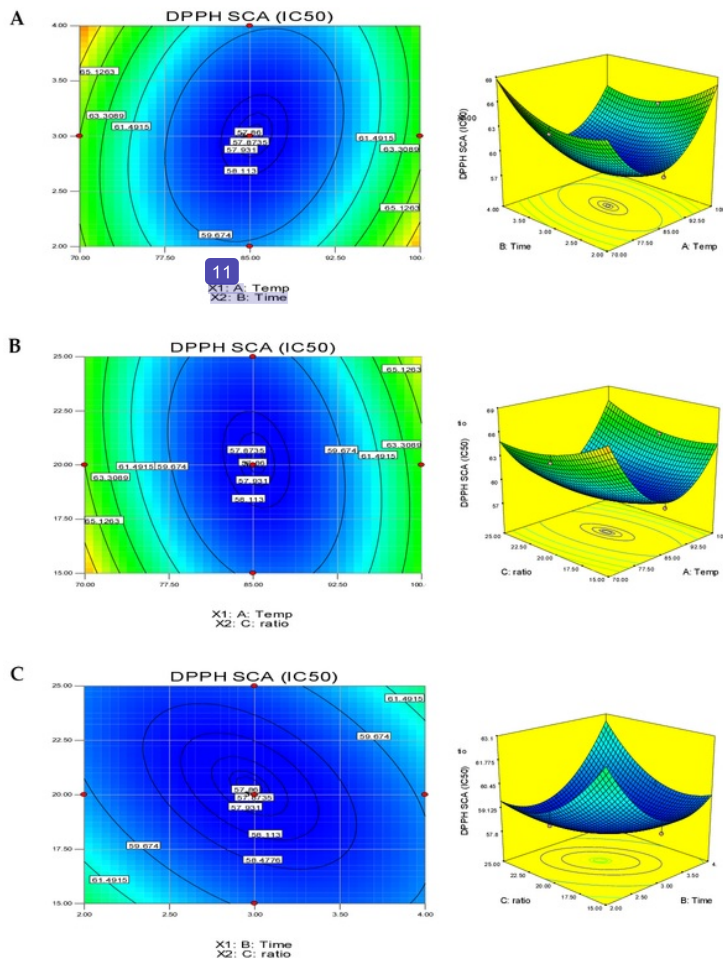

787 **Figure 8.** Response surface plots and contour plots for the effect of temperature and time (A);  
 788 temperature and solvent/sample ratio (B); time and solvent/sample ratio (C) on the DPPH radical  
 789 scavenging effect of NEPP from BDPK.

## 790 3.3.5. Response Surface Analysis of Cytotoxic Activity

791 <sup>8</sup> MTT assay was used to assess the cytotoxic properties of the NEPP extracts, <sup>8</sup> which provides a  
 792 simple method for determination of the cell's viability based on the activity of mitochondria in living  
 793 cells. The NEPP extracts showed a selective antiproliferative effect against the two human cancer cell  
 794 lines, A549 and HT29. Interestingly, the normal cell lines, 3T3 showed good resistance with median  
 795 <sup>8</sup> inhibitory concentration (IC<sub>50</sub>) values of higher than 100 µg/mL of NEPP extracts of BDPK [13]. The  
 796 IC<sub>50</sub> values for the active extracts and the respective standard reference drug (paclitaxel) were  
 797 calculated for the two tested cell lines after 24 and 72 h of incubations [13].  
 798

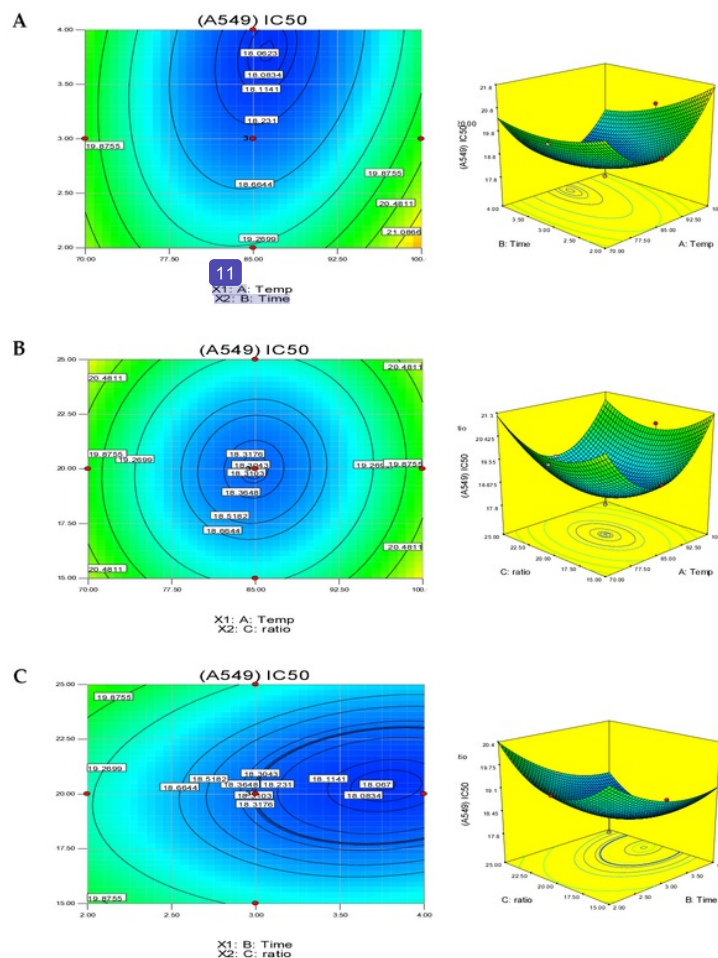

799 <sup>4</sup> **Figure 9.** Response surface plots and contour plots for the effect of temperature and time (A);  
 800 temperature and solvent/sample ratio (B); time and solvent/sample ratio (C) on the cytotoxic effect of  
 801 NEPP from BDPK in human lung (A549) cancer cells.

802 Experimental results of cytotoxic effects of NEPP in BDPK on cancer cells are presented in Table  
 803 6. The antiproliferative/cytotoxic effect, which is represented by IC<sub>50</sub> ranged between  $17.84 \pm 0.9$  and  
 804  $22.54 \pm 5.21$  µg/mL in A549, and between  $31.48 \pm 5.5$  and  $34.43 \pm 2.76$  µg/mL in HT29. The lowest IC<sub>50</sub>  
 805 ( $17.84 \pm 0.9$  µg/mL and  $31.48 \pm 5.5$  µg/mL), i.e. highest cytotoxic activity, of NEPP on A549 and HT29,  
 806 respectively was recorded under experimental parameters of 85°C temperature, 3h time and  
 807 solvent/sample ratio of 20:1 mL/g. There is a close agreement between the observed values of IC<sub>50</sub> in

808 A549 and HT29 and the theoretical values predicted by the design (Figure 11). The model predicted  
 809 a minimum  $IC_{50}$  (highest cytotoxic effect) of NEPP on A549 and HT29 (18.30 and 31.69, respectively)  
 810 under the same factor levels combination (85°C temperature, 3 h time and 20:1 mL/g solvent/sample  
 811 ratio) as obtained from the empirical experiments (Figure 11). The good correlation between these  
 812 results confirmed that the design was adequate to reflect the expected optimisation. The predictive  
 813 quadratic model equations (6 and 7) for extraction conditions with  $IC_{50}$  as target response of the  
 814 antiproliferative effect of NEPP on A549 and HT29 are illustrated in Table 7.  
 815

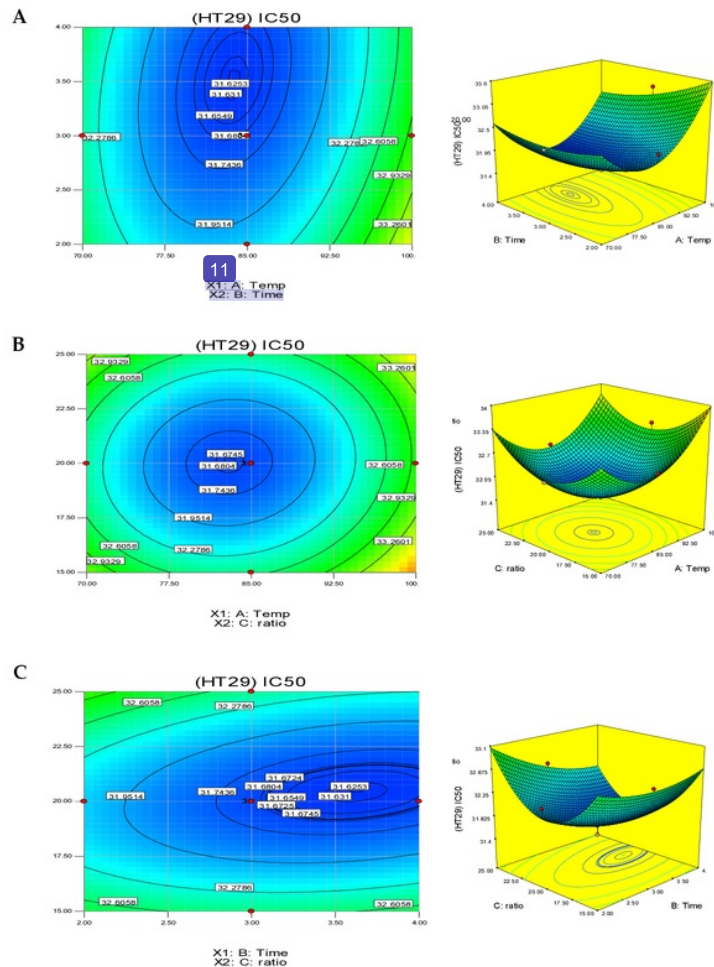

816 **Figure 10.** Response surface plots and contour plots for the effect of temperature and time (A);  
 817 temperature and solvent/sample ratio (B); time and solvent/sample ratio (C) on the cytotoxic effect of  
 818 NEPP from BDPK in human colon (HT29) cancer cells.

819 It can be seen that the linear term of extraction temperature exhibited a positive effect ( $p < 0.05$ )  
 820 on  $IC_{50}$  in HT29, which means that  $IC_{50}$  increases, i.e. cytotoxic activity decreases, with increasing  
 821 extraction temperature. However, the linear term of extraction temperature was not significant ( $p >$   
 822 0.05) in the case of A549.

823 Moreover, extraction time showed significant negative effect ( $p < 0.01$ ) on  $IC_{50}$  in both A549 and  
 824 HT29 (Table 6; Table 7, equations 6 and 7), which means that the cytotoxic activity of NEPP on both  
 825 cells will be best at 3 h. On the other hand, the interaction between extraction temperature and

826 extraction time had a significant negative influence on  $IC_{50}$  in both cells. This means that higher  
827 cytotoxic activity will be preserved by prolonged extraction time only if the temperature at the  
828 middle level (85°C) is applied as extraction temperature (Figure 9A and 10A).

829 It is the same case with application of longer time (4 h), which demands the application of 20:1  
830 mL/g, solvent/sample ratio for the preservation of relatively high cytotoxic activity of NEPP in HT29  
831 (Figure 11C). Moreover, all quadratic terms of NEPP extraction parameters had a significant effect ( $p$   
832  $< 0.05$ ) on  $IC_{50}$ , which was positive. The positive effect of the quadratic terms of extraction parameters  
833 means that cytotoxic activity of NEPP will decrease significantly at a higher level of these variables.,  
834 which is clearly visible in Figure 9A, B, C and Figure 10A, B. The model equations for the empirically  
835 determined  $IC_{50}$  are presented in Table 7. These findings were further supported by the results  
836 obtained from DPPH scavenging activity test.

### 837 3.4. Verification of the Predictive Model

838 In order to verify the predictive mathematical model of the investigated process, extraction of  
839 NEPP from BDPK was performed at optimal conditions for maximised TPC, TFC, TPAC and extract  
840 yield and minimised  $IC_{50}$ . Results of investigated responses in optimised NEPP extract were  
841  $10.78 \pm 0.11$  mg GAE/ g DW,  $4.14 \pm 0.03$  mg CE/g DW,  $8.61 \pm 0.14$  mg CE/g DW,  $14.20 \pm 0.14\%$ ,  $57.52 \pm$   
842  $4.52 \mu\text{g/mL}$ ,  $17.4 \pm 0.6 \mu\text{g/mL}$  and  $31.4 \pm 0.54 \mu\text{g/mL}$  for TPC, TFC, TPAC,  $IC_{50}$  of DPPH and  $IC_{50}$  of MTT  
843 for A549 and HT29, respectively. Comparison of predicted and experimental results showed that the  
844 experimental values of the all seven responses were obtained and differed only minimally from the  
845 predicted values with residual standard error of  $< 4\%$ , indicating that the established model was  
846 effective.

847 TPC obtained in the optimised extract was lower than TPC as predicted by the model. On the  
848 other hand, TFC and TPAC results from optimisation process were higher than TFC and TPAC  
849 predicted model (Table 9). Interestingly, the  $IC_{50}$  (DPPH, A549 and HT29) of optimised NEPP extracts  
850 from BDPK were lower when compared with their predicted values (-1.13, -3.53 and -0.85,  
851 respectively). It has been confirmed that, besides increased NEPP yield, optimised extraction  
852 condition provides extracts with highest cytotoxic capacity and antioxidant activity.  
853

854

855

856

857

858

859

860

861

862

863

864

865

**Table 9.** Validation of the experimental model.

| Variable investigated            | Responses         |                  |                   |                                   |            |                               |                               |  |
|----------------------------------|-------------------|------------------|-------------------|-----------------------------------|------------|-------------------------------|-------------------------------|--|
|                                  | TPC (mg GAE/g DW) | TFC (mg CE/g DW) | TPAC (mg CE/g DW) | DPPH SCA (IC <sub>50</sub> µg/mL) | Yield (%)  | A549 (IC <sub>50</sub> µg/mL) | HT29 (IC <sub>50</sub> µg/mL) |  |
| Temperature (85.17°C)            | Actual            | 4.14±0.03        | 8.61± 0.14        | 57.52± 4.52                       | 14.20±0.14 | 17.4±0.6                      | 31.4±0.54                     |  |
| Time (3.20h)                     | Predicted         | 4.13             | 8.55              | 57.93                             | 14.06      | 18.00                         | 31.66                         |  |
| Solvent/sample ratio (20:1 mL/g) |                   |                  |                   |                                   |            |                               |                               |  |
| Predicted error (%)              |                   | -0.32            | 0.16              | 0.68                              | -1.13      | -3.53                         | -0.85                         |  |

Responses are means ±SD (n=3)

TPC, total phenolic content; TFC, total flavonoid content;

DPPH, (2,2-diphenyl-1-picrylhydrazyl) radical scavenging activity; IC<sub>50</sub>, concentration of a substance/treatment required to inhibit DPPH radical/cell growth by half (50%); NEPP, non-extractable polyphenols.

867  
868  
869  
870  
871  
872  
873  
874  
875  
876  
877  
878  
879  
880  
881  
882  
883  
884  
885  
886

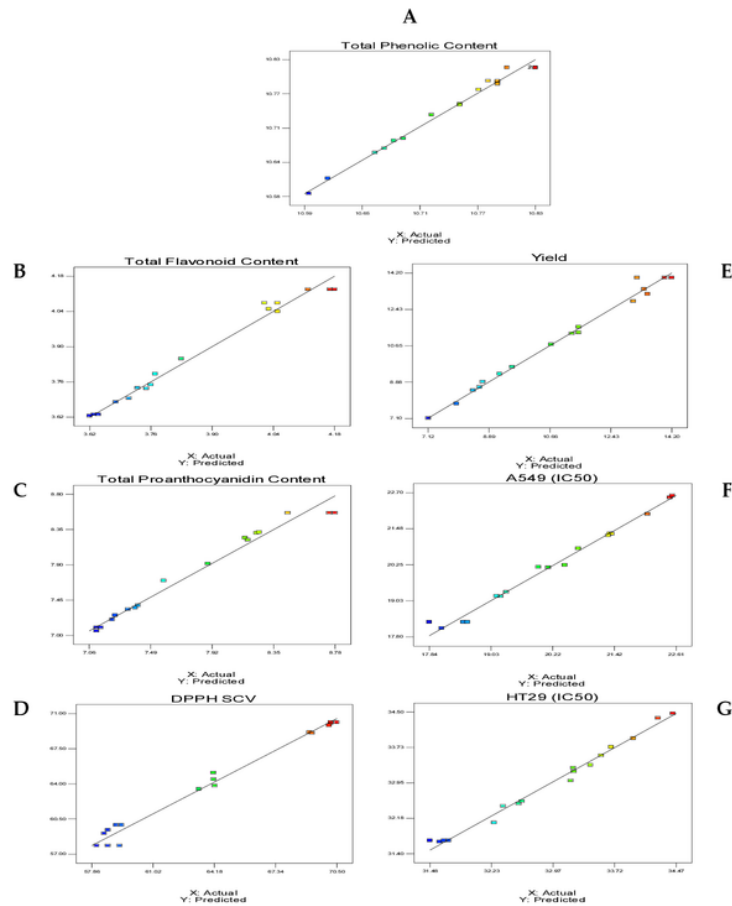

888 **Figure 11.** Correlation graph between the predicted and experimental yield values. (A) The  
 889 correlation graph of total phenolic content; (B) The correlation graph of total flavonoid content; (C)  
 890 The correlation graph of total proanthocyanidin content; (D) The correlation graph of DPPH  
 891 scavenging capacity; (E) The correlation graph of extracts yield (F) The correlation graph of  
 892 cytotoxicity of NEPP extracts on A549 and (G) HT29 cells.

893 **4. Conclusions**

894 This study was conducted to model and optimise the extraction conditions with acid hydrolysis  
 895 for maximising the recovery of bound or NEPP (TPC, TFC and TPAC), DPPH radical scavenging  
 896 activity and the inhibitory potential of the NEPP extract from BDPK on the proliferation of A549 and  
 897 HT29 cells by employing RSM. Quadratic models for the seven evaluation indices were obtained with  
 898  $R^2$  in the range of 0.9760–0.9894. The simultaneous optimisation of the multi-response system by  
 899 desirability function indicated that the desirability of 93.4% can be possible under these conditions:  
 900 extraction time, 3.20 h; solvent/sample ratio, (20:1mL/g) and extraction temperature (85.17°C). Acid  
 901 hydrolysis treatment effectively promoted the recovery of NEPP in BDPK remaining in the residue,  
 902 which is usually missed out during conventional solvent extraction. The acid cleaved the interflavan  
 903 bonds, resulting in a conversion of NEPP into red anthocyanidins.

904 Notably, to the best of our knowledge, this is the first report on DPPH radical scavenging activity  
 905 and cytotoxicity screening of NEPP from DPK, Barhi variety. However, BDPK was found to contain

906 a higher EPP fraction [12,13], compared to the NEPP fraction, and the ability of EPP to scavenge  
907 DPPH radicals and to inhibit the cancer cells' growth was better than of NEPP [12,13]. Here, it is  
908 important to remember that this hydrolysis was acidic (PH ~4), and this is necessary, particularly  
909 "when the glycosylation patterns are extremely complex, and when standard reference materials of  
910 polyphenol glycosides are unavailable. The hydrolysis can simplify the chromatographic profile  
911 during separation, and aid quantification and structural identification of the polyphenols" [28].  
912 However, this acidic environment could have allowed additional compounds to be released that were  
913 not polyphenols or could have broken down some phenolic compounds occurring as glycosides into  
914 aglycones [17].

915 Also, when acid hydrolysis is performed at a high temperature, it can lead to a loss of phenolic  
916 compounds [66]. This possibility could also have led to a false reading in the NEPP detection, which  
917 could have been misleading in the overall data collection. The non-extractable polyphenol is rarely  
918 studied, however, with further research, it has the potential to be utilised as an anticancer and  
919 antioxidant agent in disease prevention studies. For future research studies, HPLC-MS results on  
920 NEPP extract will allow researchers to understand the exact compounds present in the extract. In  
921 summary, the response surface methodology could be successfully employed to optimise the  
922 extraction of NEPP fraction from BDPK and the results demonstrate that the extract has a significant  
923 inhibitory effect on lung and colorectal cancer cells *in-vitro*.  
924

925 **Author Contributions:** Conceptualization, I.M. and M.M.; methodology, I.M.; validation, M.M.; investigation,  
926 I.M. and M.M.; resources, M.M., F.Y., M.A.; data curation, I.M.; writing—original draft preparation, I.M.;  
927 writing—review and editing, I.M. and M.M.; supervision, M.M, F.Y. and M.A.

928 **Funding:** This research received no external funding.

929 **Conflicts of Interest:** The authors declare no conflict of interest.

## 930 References

- 931 1. Mahmud, I.A.; Mirghani, M.E.S.; Alkhatib, M.F.R.; Shahbuddin, M.; Rashidi, O.; Daoud Jamal, I.  
932 Nutrients depictions of Barhi date palm (*Phoenix dactylifera* L.) kernels. *International Food Research*  
933 *Journal* **2017**.
- 934 2. Sirisena, S.; Ng, K.; Ajlouni, S. The Emerging Australian Date Palm Industry: Date Fruit Nutritional and  
935 Bioactive Compounds and Valuable Processing By-Products. *Comprehensive Reviews in Food Science and*  
936 *Food Safety* **2015**, *14*, 813-823.
- 937 3. Al-Farsi, M.; Alasalvar, C.; Al-Abid, M.; Al-Shoaily, K.; Al-Amry, M.; Al-Rawahy, F. Compositional and  
938 functional characteristics of dates, syrups, and their by-products. *Food Chemistry* **2007**, *104*, 943-947.
- 939 4. Besbes, S.; Blecker, C.; Deroanne, C.; Drira, N.-E.; Attia, H. Date seeds: chemical composition and  
940 characteristic profiles of the lipid fraction. *Food chemistry* **2004**, *84*, 577-584.
- 941 5. Gullon, B.; Pintado, M.E.; Barber, X.; Fernández-López, J.; Pérez-Álvarez, J.A.; Viuda-Martos, M.  
942 Bioaccessibility, changes in the antioxidant potential and colonic fermentation of date pits and apple  
943 bagasse flours obtained from co-products during simulated *in vitro* gastrointestinal digestion. *Food*  
944 *Research International* **2015**, *78*, 169-176.
- 945 6. Sekeroglu, N.; Senol, F.S.; Orhan, I.E.; Gulpinar, A.R.; Kartal, M.; Sener, B. In vitro prospective effects  
946 of various traditional herbal coffees consumed in Anatolia linked to neurodegeneration. *Food research*  
947 *international* **2012**, *45*, 197-203.
- 948 7. Al-Farsi, M.; Lee, C.Y. Optimization of phenolics and dietary fibre extraction from date seeds. *Food*  
949 *Chemistry* **2008**, *108*, 977-985.

- 950 8. Elberry, A.A.; Mufti, S.T.; Al-Maghrabi, J.A.; Abdel-Sattar, E.A.; Ashour, O.M.; Ghareib, S.A.; Mosli,  
951 H.A. Anti-inflammatory and antiproliferative activities of date palm pollen (*Phoenix dactylifera*) on  
952 experimentally-induced atypical prostatic hyperplasia in rats. *Journal of Inflammation* **2011**, *8*, 40.
- 953 9. Habib, H.; Ibrahim, W. Effect of date pits on oxidative damage and antioxidant defense systems in rat  
954 tissues. *The FASEB Journal* **2008**, *22*, 890.826-890.826.
- 955 10. Ishurd, O.; Kennedy, J.F. The anti-cancer activity of polysaccharide prepared from Libyan dates  
956 (*Phoenix dactylifera* L.). *Carbohydrate Polymers* **2005**, *59*, 531-535.
- 957 11. Takaedi, M.R.; Jahangiri, A.; Khodayar, M.J.; Siahpoosh, A.; Yaghooti, H.; Rezaei, S.; Salech, M.;  
958 Mansourzadeh, Z. The effect of date seed (*Phoenix dactylifera*) extract on paraoxonase and arylesterase  
959 activities in hypercholesterolemic rats. *Jundishapur journal of natural pharmaceutical products* **2014**, *9*, 30.
- 960 12. Mahmud, I.A.; Mirghani, M.E.S.; Alkhatib, M.a.F.R.; Yusof, F.; Kabbashi, N.A.; Hilles, A.R.;  
961 Shahabuddin, M. Optimisation of anticancer activity of extractable polyphenols from Barhi date palm  
962 kernels to human cancer A549 cell line using response surface methodology. *STUDIA UBB CHEMIA*  
963 *(under review)* **2019**.
- 964 13. Mahmud, I.A.; Mirghani, M.E.S.; Al-Qubaisi, M.; Yee, B.C.; Ismail, N.; Rasedee, A.; Yusof, F.;  
965 Shahabuddin, M.; Alkhatib, M.a.F.R.; Kabbashi, N.A., et al. Induction of apoptosis and cell cycle arrest  
966 in two human cancer A549 and HT29 cells lines by Barhi date palm kernels extracts and three isolated  
967 cytotoxic compounds. *Medicina (under review)* **2019**, 10.20944/preprints201906.0003.v1,  
968 doi:10.20944/preprints201906.0003.v1.
- 969 14. Cai, Y.; Sun, M.; Corke, H. Antioxidant activity of betalains from plants of the Amaranthaceae. *Journal*  
970 *of Agricultural and Food Chemistry* **2003**, *51*, 2288-2294.
- 971 15. Soobrattee, M.A.; Neergheen, V.S.; Luximon-Ramma, A.; Aruoma, O.I.; Bahorun, T. Phenolics as  
972 potential antioxidant therapeutic agents: mechanism and actions. *Mutation Research/Fundamental and*  
973 *Molecular Mechanisms of Mutagenesis* **2005**, *579*, 200-213.
- 974 16. Bravo, L. Polyphenols: chemistry, dietary sources, metabolism, and nutritional significance. *Nutrition*  
975 *reviews* **1998**, *56*, 317-333.
- 976 17. Pérez-Jiménez, J.; Torres, J.L. Analysis of nonextractable phenolic compounds in foods: the current state  
977 of the art. *Journal of Agricultural and Food Chemistry* **2011**, *59*, 12713-12724.
- 978 18. Thouri, A.; Chahdoura, H.; El Arem, A.; Hichri, A.O.; Hassin, R.B.; Achour, L. Effect of solvents  
979 extraction on phytochemical components and biological activities of Tunisian date seeds (var. Korkobbi  
980 and Arechti). *BMC complementary and alternative medicine* **2017**, *17*, 248.
- 981 19. Habib, H.; Platat, C.; Meudec, E.; Cheynier, V.; Ibrahim, W. Polyphenolic compounds in date fruit seed  
982 (*Phoenix dactylifera*): characterisation and quantification by using UPLC-DAD-ESI-MS. *Journal of the*  
983 *Science of Food and Agriculture* **2014**, *94*, 1084-1089.
- 984 20. Ahmed, A.F.; Al-Qahtani, J.H.; Al-Yousef, H.M.; Al-Said, M.S.; Ashour, A.E.; Al-Sohaibani, M.;  
985 Rafatullah, S. Proanthocyanidin-rich date seed extract protects against chemically induced hepatorenal  
986 toxicity. *Journal of medicinal food* **2015**, *18*, 280-289.
- 987 21. Pérez-Jiménez, J.; Arranz, S.; Saura-Calixto, F. Proanthocyanidin content in foods is largely  
988 underestimated in the literature data: an approach to quantification of the missing proanthocyanidins.  
989 *Food research international* **2009**, *42*, 1381-1388.
- 990 22. Arranz, S.; Saura-Calixto, F.; Shaha, S.; Kroon, P.A. High contents of nonextractable polyphenols in  
991 fruits suggest that polyphenol contents of plant foods have been underestimated. *Journal of Agricultural*  
992 *and Food Chemistry* **2009**, *57*, 7298-7303.

- 993 23. Beckman, C.H. Phenolic-storing cells: keys to programmed cell death and periderm formation in wilt  
994 disease resistance and in general defence responses in plants? *Physiological and Molecular Plant Pathology*  
995 **2000**, *57*, 101-110.
- 996 24. Pérez-Jiménez, J.; Díaz-Rubio, M.E.; Saura-Calixto, F. Non-extractable polyphenols, a major dietary  
997 antioxidant: occurrence, metabolic fate and health effects. *Nutrition research reviews* **2013**, *26*, 118-129.
- 998 25. Saura-Calixto, F.; Serrano, J.; Goni, I. Intake and bioaccessibility of total polyphenols in a whole diet.  
999 *Food Chemistry* **2007**, *101*, 492-501.
- 1000 26. Cheng, A.; Yan, H.; Han, C.; Chen, X.; Wang, W.; Xie, C.; Qu, J.; Gong, Z.; Shi, X. Acid and Alkaline  
1001 Hydrolysis Extraction of Non-Extractable Polyphenols in Blueberries: Optimisation by Response  
1002 Surface Methodology. *Czech Journal of Food Science* **2014**, *32*.
- 1003 27. Tow, W.W.; Premier, R.; Jing, H.; Ajlouni, S. Antioxidant and antiproliferation effects of extractable and  
1004 nonextractable polyphenols isolated from apple waste using different extraction methods. *Journal of*  
1005 *food science* **2011**, *76*.
- 1006 28. Tsao, R. Chemistry and biochemistry of dietary polyphenols. *Nutrients* **2010**, *2*, 1231-1246.
- 1007 29. Turabi, E.; Sumnu, G.; Sahin, S. Optimization of baking of rice cakes in infrared–microwave  
1008 combination oven by response surface methodology. *Food and Bioprocess Technology* **2008**, *1*, 64-73.
- 1009 30. Liyana-Pathirana, C.; Shahidi, F. Optimization of extraction of phenolic compounds from wheat using  
1010 response surface methodology. *Food chemistry* **2005**, *93*, 47-56.
- 1011 31. Guyot, S.; Marnet, N.; Drilleau, J.-F. Thiolytic– HPLC characterization of apple procyanidins covering  
1012 a large range of polymerization states. *Journal of Agricultural and Food Chemistry* **2001**, *49*, 14-20.
- 1013 32. Sulaiman, I.S.C.; Basri, M.; Masoumi, H.R.F.; Chee, W.J.; Ashari, S.E.; Ismail, M. Effects of temperature,  
1014 time, and solvent ratio on the extraction of phenolic compounds and the anti-radical activity of  
1015 *Clinacanthus nutans* Lindau leaves by response surface methodology. *Chemistry Central Journal* **2017**,  
1016 *11*, 54.
- 1017 33. Sirisena, S.; Zabarar, D.; Ng, K.; Ajlouni, S. Characterization of Date (Deglet Nour) Seed Free and Bound  
1018 Polyphenols by High-Performance Liquid Chromatography-Mass Spectrometry. *Journal of food science*  
1019 **2017**, *82*, 333-340.
- 1020 34. Gao, L.; Wang, S.; Oomah, B.; Mazza, G. Wheat quality: Antioxidant activity of wheat millstreams.  
1021 *Wheat quality elucidation* **2002**, 219-233.
- 1022 35. Sun, J.-S.; Tsuang, Y.-H.; Chen, I.-J.; Huang, W.-C.; Hang, Y.-S.; Lu, F.-J. An ultra-weak  
1023 chemiluminescence study on oxidative stress in rabbits following acute thermal injury. *Burns* **1998**, *24*,  
1024 225-231.
- 1025 36. Do, Q.D.; Angkawijaya, A.E.; Tran-Nguyen, P.L.; Huynh, L.H.; Soetaredjo, F.E.; Ismadji, S.; Ju, Y.-H.  
1026 Effect of extraction solvent on total phenol content, total flavonoid content, and antioxidant activity of  
1027 *Limnophila aromatica*. *Journal of food and drug analysis* **2014**, *22*, 296-302.
- 1028 37. Chan, S.; Lee, C.; Yap, C.; Mustapha, W.A.W.; Ho, C. Optimisation of extraction conditions for phenolic  
1029 compounds from limau purut (*Citrus hystrix*) peels. *International Food Research Journal* **2009**, *16*, 203-213.
- 1030 38. Naczek, M.; Shahidi, F. Extraction and analysis of phenolics in food. *Journal of Chromatography A* **2004**,  
1031 *1054*, 95-111.
- 1032 39. Zhou, J.; Zheng, X.; Yang, Q.; Liang, Z.; Li, D.; Yang, X.; Xu, J. Optimization of ultrasonic-assisted  
1033 extraction and radical-scavenging capacity of phenols and flavonoids from *Clerodendrum*  
1034 *cyrtophyllum* Turcz leaves. *PloS one* **2013**, *8*, e68392.

- 1035 40. Lafka, T.-I.; Sinanoglou, V.; Lazos, E.S. On the extraction and antioxidant activity of phenolic  
1036 compounds from winery wastes. *Food Chemistry* **2007**, *104*, 1206-1214.
- 1037 41. Harada, H.; Noro, T.; Kamei, Y. Selective antitumor activity in vitro from marine algae from Japan  
1038 coasts. *Biological and Pharmaceutical Bulletin* **1997**, *20*, 541-546.
- 1039 42. Silva, E.; Rogez, H.; Larondelle, Y. Optimization of extraction of phenolics from *Inga edulis* leaves using  
1040 response surface methodology. *Separation and Purification Technology* **2007**, *55*, 381-387.
- 1041 43. Dong, J.; Liu, Y.; Liang, Z.; Wang, W. Investigation on ultrasound-assisted extraction of salvianolic acid  
1042 B from *Salvia miltiorrhiza* root. *Ultrasonics Sonochemistry* **2010**, *17*, 61-65.
- 1043 44. Wang, X.; Jiang, Y.; Hu, D. Optimization and in vitro antiproliferation of *Curcuma wenyujin*'s active  
1044 extracts by ultrasonication and response surface methodology. *Chemistry Central Journal* **2016**, *10*, 32.
- 1045 45. Khan, F.; Ahmed, F.; Pushparaj, P.N.; Abuzenadah, A.; Kumosani, T.; Barbour, E.; AlQahtani, M.;  
1046 Gauthaman, K. Ajwa date (*Phoenix dactylifera* L.) extract inhibits human breast Adenocarcinoma  
1047 (MCF7) cells in vitro by inducing apoptosis and cell cycle arrest. *PLoS ONE* **2016**, *11*, e0158963.
- 1048 46. Al-Sayyed, H.F.; Takruri, H.R.; Shomaf, M.S. The effect of date palm fruit (*Phoenix dactylifera* L.) on 7,  
1049 12-dimethylbenz ( $\alpha$ ) anthracene (DMBA)-induced mammary cancer in rats. *Research Opinions in Animal  
1050 and Veterinary Sciences* **2014**, *4*, 11-18.
- 1051 47. Eid, N.; Enani, S.; Walton, G.; Corona, G.; Costabile, A.; Gibson, G.; Rowland, I.; Spencer, J.P. The impact  
1052 of date palm fruits and their component polyphenols, on gut microbial ecology, bacterial metabolites  
1053 and colon cancer cell proliferation. *Journal of nutritional science* **2014**, *3*.
- 1054 48. Hemwimol, S.; Pavasant, P.; Shotipruk, A. Ultrasound-assisted extraction of anthraquinones from roots  
1055 of *Morinda citrifolia*. *Ultrasonics Sonochemistry* **2006**, *13*, 543-548.
- 1056 49. Spigno, G.; Tramelli, L.; De Faveri, D.M. Effects of extraction time, temperature and solvent on  
1057 concentration and antioxidant activity of grape marc phenolics. *Journal of food engineering* **2007**, *81*, 200-  
1058 208.
- 1059 50. Ho, C.H.; Cacace, J.E.; Mazza, G. Extraction of lignans, proteins and carbohydrates from flaxseed meal  
1060 with pressurized low polarity water. *LWT-Food Science and Technology* **2007**, *40*, 1637-1647.
- 1061 51. Vuorela, S.; Kreander, K.; Karonen, M.; Nieminen, R.; Hämäläinen, M.; Galkin, A.; Laitinen, L.;  
1062 Salminen, J.-P.; Moilanen, E.; Pihlaja, K. Preclinical evaluation of rapeseed, raspberry, and pine bark  
1063 phenolics for health related effects. *Journal of agricultural and food chemistry* **2005**, *53*, 5922-5931.
- 1064 52. Borochoy-Neori, H.; Judeinstein, S.; Greenberg, A.; Volkova, N.; Rosenblat, M.; Aviram, M. Antioxidant  
1065 and antiatherogenic properties of phenolic acid and flavonol fractions of fruits of 'Amari' and  
1066 'Hallawi' date (*Phoenix dactylifera* L.) varieties. *Journal of agricultural and food chemistry* **2015**, *63*, 3189-  
1067 3195.
- 1068 53. Vinson, J.A.; Zubik, L.; Bose, P.; Samman, N.; Proch, J. Dried fruits: excellent in vitro and in vivo  
1069 antioxidants. *Journal of the American College of Nutrition* **2005**, *24*, 44-50.
- 1070 54. Azahar, N.F.; Gani, S.S.A.; Mokhtar, N.F.M. Optimization of phenolics and flavonoids extraction  
1071 conditions of *Curcuma Zedoaria* leaves using response surface methodology. *Chemistry Central Journal*  
1072 **2017**, *11*, 96.
- 1073 55. Rajha, H.N.; El Darra, N.; Hobaika, Z.; Boussetta, N.; Vorobiev, E.; Maroun, R.G.; Louka, N. Extraction  
1074 of total phenolic compounds, flavonoids, anthocyanins and tannins from grape byproducts by response  
1075 surface methodology. Influence of solid-liquid ratio, particle size, time, temperature and solvent  
1076 mixtures on the optimization process. *Food and Nutrition sciences* **2014**, *5*, 397.

- 1077 56. Spigno, G.; De Faveri, D.M. Antioxidants from grape stalks and marc: Influence of extraction procedure  
1078 on yield, purity and antioxidant power of the extracts. *Journal of Food Engineering* **2007**, *78*, 793-801.
- 1079 57. Ramos, L.; Kristenson, E.; Brinkman, U.T. Current use of pressurised liquid extraction and subcritical  
1080 water extraction in environmental analysis. *Journal of Chromatography A* **2002**, *975*, 3-29.
- 1081 58. Tabaraki, R.; Nateghi, A. Optimization of ultrasonic-assisted extraction of natural antioxidants from  
1082 rice bran using response surface methodology. *Ultrasonics sonochemistry* **2011**, *18*, 1279-1286.
- 1083 59. Vajić, U.-J.; Grujić-Milanović, J.; Živković, J.; Šavikin, K.; Godevac, D.; Miloradović, Z.; Bugarski, B.;  
1084 Mihailović-Stanojević, N. Optimization of extraction of stinging nettle leaf phenolic compounds using  
1085 response surface methodology. *Industrial Crops and Products* **2015**, *74*, 912-917.
- 1086 60. Gómez, F.S.; Sánchez, S.P.; Iradi, M.G.G.; Azman, N.A.M.; Almajano, M.P. Avocado seeds: extraction  
1087 optimization and possible use as antioxidant in food. *Antioxidants* **2014**, *3*, 439-454.
- 1088 61. Gonzales, G.B.; Smagghe, G.; Raes, K.; Van Camp, J. Combined alkaline hydrolysis and ultrasound-  
1089 assisted extraction for the release of nonextractable phenolics from cauliflower (*Brassica oleracea* var.  
1090 botrytis) waste. *Journal of agricultural and food chemistry* **2014**, *62*, 3371-3376.
- 1091 62. Bonilla, F.; Mayen, M.; Merida, J.; Medina, M. Extraction of phenolic compounds from red grape marc  
1092 for use as food lipid antioxidants. *Food Chemistry* **1999**, *66*, 209-215.
- 1093 63. Pinelo, M.; Del Fabbro, P.; Manzocco, L.; Nuñez, M.J.; Nicoli, M.C. Optimization of continuous phenol  
1094 extraction from *Vitis vinifera* byproducts. *Food Chemistry* **2005**, *92*, 109-117.
- 1095 64. El Hajj, Y.; Louka, N.; Nguyen, C.; Maroun, R.G. Low cost process for phenolic compounds extraction  
1096 from cabernet sauvignon grapes (*Vitis vinifera* L. cv. cabernet sauvignon). Optimization by response  
1097 surface methodology. *Food and Nutrition Sciences* **2012**, *3*, 89-103.
- 1098 65. Shimamura, T.; Sumikura, Y.; Yamazaki, T.; Tada, A.; Kashiwagi, T.; Ishikawa, H.; Matsui, T.; Sugimoto,  
1099 N.; Akiyama, H.; Ukeda, H. Applicability of the DPPH assay for evaluating the antioxidant capacity of  
1100 food additives—inter-laboratory evaluation study—. *Analytical Sciences* **2014**, *30*, 717-721.
- 1101 66. Acosta-Estrada, B.A.; Gutiérrez-Urbe, J.A.; Serna-Saldívar, S.O. Bound phenolics in foods, a review.  
1102 *Food chemistry* **2014**, *152*, 46-55.  
1103

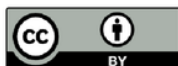

© 2019 by the authors. Submitted for possible open access publication under the terms and conditions of the Creative Commons Attribution (CC BY) license (<http://creativecommons.org/licenses/by/4.0/>).

## ORIGINALITY REPORT

---

10%

SIMILARITY INDEX

11%

INTERNET SOURCES

12%

PUBLICATIONS

7%

STUDENT PAPERS

---

## PRIMARY SOURCES

---

- 1** Zeković, Zoran, Jelena Vladić, Senka Vidović, Dušan Adamović, and Branimir Pavlić. "Optimization of microwave-assisted extraction (MAE) of coriander phenolic antioxidants - Response surface methodology approach", Journal of the Science of Food and Agriculture, 2016.  
Publication 1%
- 2** journals.plos.org  
Internet Source 1%
- 3** www.ifrj.upm.edu.my  
Internet Source 1%
- 4** www.mdpi.com  
Internet Source 1%
- 5** ccj.springeropen.com  
Internet Source 1%
- 6** agriculturejournals.cz  
Internet Source 1%
- 7** file.scirp.org

---

Internet Source

1%

---

8

[bmccomplementalalternmed.biomedcentral.com](http://bmccomplementalalternmed.biomedcentral.com)

Internet Source

1%

---

9

Submitted to Universiti Kebangsaan Malaysia

Student Paper

1%

---

10

Sameera Sirisena, Dimitrios Zabarar, Ken Ng, Said Ajlouni. " Characterization of Date ( ) Seed Free and Bound Polyphenols by High-Performance Liquid Chromatography-Mass Spectrometry ", Journal of Food Science, 2017

Publication

1%

---

11

Submitted to University of Birmingham

Student Paper

1%

---

Exclude quotes      On

Exclude matches      < 1%

Exclude bibliography      On
